1  
2  
3  
4  
5  
6  
7  
8  
9  
10  
11  
12  
13  
14  
15  
16  
17  
18  
19  
20  
21  
22  
23  
24  
25  
26  
27  
28  
29  
30

## **A common polymorphism that protects from cardiovascular disease increases fibronectin processing and secretion**

Sébastien Soubeyrand, PhD<sup>a\*</sup>, Paulina Lau MSc<sup>a</sup>, Majid Nikpay, PhD<sup>a</sup>, Anh-Thu Dang MSc<sup>a</sup>, and Ruth McPherson, MD, PhD<sup>a,b\*</sup>.

<sup>a</sup> Atherogenomics Laboratory, University of Ottawa Heart Institute, Ottawa, Canada; <sup>b</sup> Department of Medicine, Ruddy Canadian Cardiovascular Genetics Centre, University of Ottawa Heart Institute, Ottawa, Canada.

**Author Contributions:** S.S. and P.L. designed, performed and analyzed experiments; A.-T. D performed experiments; M.N. completed bioinformatic analyses; R.M. and S.S. wrote the manuscript.

\* To whom correspondence may be addressed:

[ssoubeyrand@ottawaheart.ca](mailto:ssoubeyrand@ottawaheart.ca)

[rmcpherson@ottawaheart.ca](mailto:rmcpherson@ottawaheart.ca)

**Competing Interest Statement:** The authors declare no competing interests.

**Keywords:** Fibronectin 1, coronary artery disease, Single nucleotide polymorphism, signal peptide, glycosylation, inflammation.

31 **Abstract**

32

33 Recent large scale bioinformatic analyses have identified common genetic variants within the  
34 fibronectin (*FN1*) gene that predispose to cardiovascular disease, through mechanisms that  
35 remain to be investigated. This work explores the underlying mechanisms and identifies a novel  
36 process controlling fibronectin secretion. First, we demonstrate that higher levels of FN1 protein  
37 in plasma associate with a reduced risk of cardiovascular disease.. Next, cellular models were  
38 leveraged to demonstrate that the CAD associated region encompasses a L15Q polymorphism  
39 within the FN1 signal peptide that impacts secretion of FN1 both qualitatively and quantitatively.  
40 Thus, by reducing FN1 secretion, a variant within the signal peptide contributes to lower  
41 circulating FN1 and increased CAD risk. In addition to providing novel functional evidence  
42 implicating FN1 in cardiovascular disease, these findings demonstrate that a common variant  
43 within a secretion signal peptide regulates protein function.

44

45

46

47

48

## 49 **Introduction**

50

51 Genome-wide Association Studies (GWAS) have identified hundreds of common single  
52 nucleotide polymorphisms (SNPs) that are significant for cardiovascular disease (CAD) risk [1–  
53 3]. Although GWAS signals are enriched for eQTLs, the identification of causal genes is  
54 challenging since 1) the vast majority of common trait related SNPs do not overlap protein  
55 coding genes and 2) are in a eQTLs for multiple genes [4,5]. Validation of statistical  
56 associations by experimental approaches is an essential first step in the development of novel  
57 therapeutic interventions. As the majority of GWAS identified variants are unlikely to be causal  
58 for several reasons, the very identification of causal SNPs among the list of GWAS identified  
59 variants is itself a complex process [6]. Indeed, predictions place at least 80% of GWAS  
60 identified SNPs within a substantially wide 34 kbp window of causal variants in Europeans [7].  
61 Clearly, mechanistic insights are limited at that level of resolution, especially since *trans* (long-  
62 distance) acting variants are prevalent and may account for significant heritability [8]. In order  
63 to pinpoint causal SNPs (“finemapping”) and identify functionally important gene targets,  
64 various approaches have been used that leverage expression data, epigenetic information, etc.  
65 [9]. This approach has yielded surprising findings including variants located within and outside  
66 genes that regulate distal genes, as well as evidence of pervasive transcription independent  
67 mechanisms [10–12].

68       The Fibronectin 1 gene (*FNI*) encodes a group of protein isoforms that differ in sequence  
69 and localization: plasma (pFN) and cellular (cFN) [13]. Both forms are synthesized as  
70 precursors that are processed during ER/Golgi trafficking and either enrich the local matrix  
71 environment (cFN) or secreted into the circulation (pFN) [14]. The cellular forms exist as  
72 multiple variants that act as key structural components and regulators of the extracellular matrix

73 (ECM), where they are deposited as insoluble fibers involved in cell adhesion. The second  
74 major form of FN1, pFN, is secreted by the liver into the circulation where it is abundant. Mice  
75 deficient in pFN display largely normal hemostasis and wound-healing, consistent with a  
76 predominant or exclusive role of cFN in these processes [15]. Interestingly, pFN deficient mice  
77 display increased neuronal apoptosis and larger infarct areas following focal brain ischemia,  
78 suggesting that pFN plays a protective role, possibly by activating anti-apoptotic mechanisms via  
79 integrin signaling [15]. While pFN is not essential to vascular integrity, pFN has been shown to  
80 penetrate the vessel wall and to constitute a significant portion of arterial FN where it may  
81 participate in tissue remodeling [16,17].

82         Here, we explore and clarify the mechanisms linking CAD to common GWAS identified  
83 variants that map to the *FN1* gene. Using bioinformatic and molecular approaches we provide  
84 evidence that differential post-transcriptional regulation underlies the *FN1*-CAD association.  
85 More specifically a polymorphism within the propeptide of FN1 was found to regulate the ability  
86 of FN1 to be secreted. These findings provide a unique portrait of a common coding variant  
87 linked to CAD that has functional consequences at the protein level without affecting its mature  
88 amino acid sequence.

89

90

91

92

93 **Results**

94

95 **rs1250259 links FN1 protein expression to coronary artery disease**

96 The CAD-linked haplotype harbors several tightly linked SNPs that correlate with the disease

97 (including top SNP rs1250229) that are causal candidates (**Figure 1, Table S1, Figure S1**).

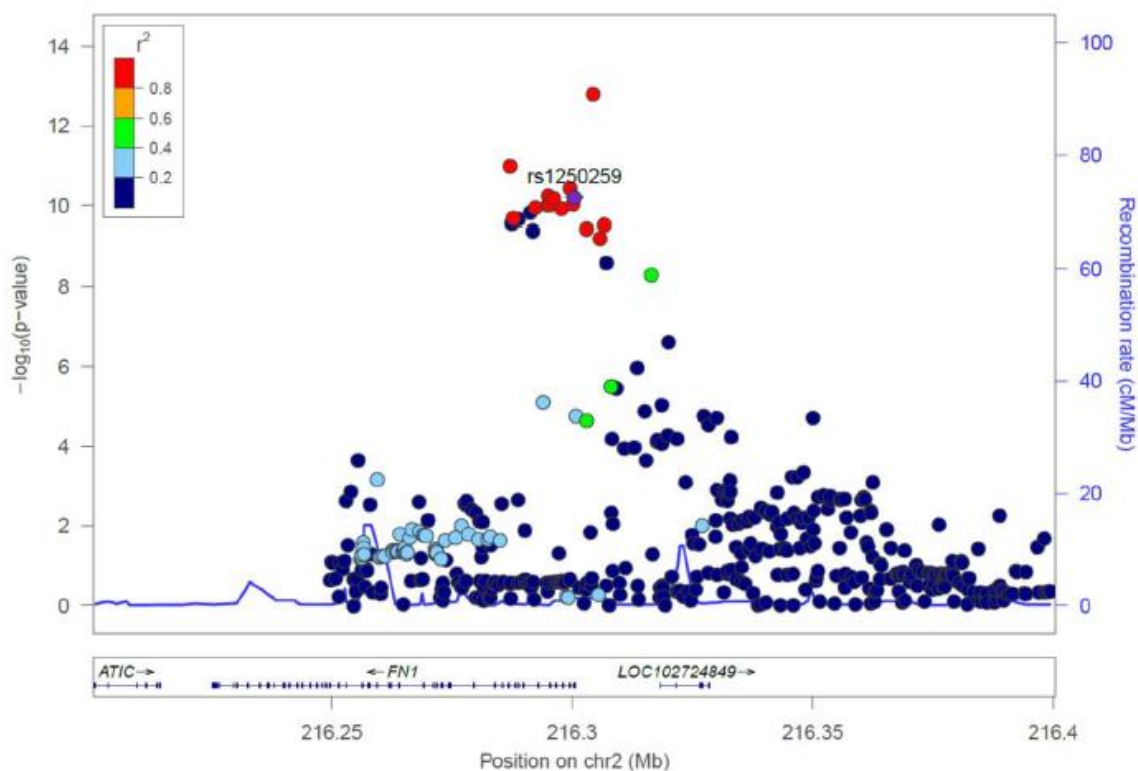

**Figure 1. Local Manhattan plot of CAD association.** CAD association data centred on rs1250259 ( $\pm 0.2$  Mb) from Van der Harst (<https://doi.org/10.1161/CIRCRESAHA.117.312086>) plotted using LocusZoom, showing a signal enrichment around the upstream region of FN1.

98

99 Strikingly, the region contains a single coding SNP (rs1250259), central to the CAD associated  
100 region, which was prioritized for follow-up. Interrogation of genome-wide association studies  
101 using PhenoScanner and Open Targets points to an association between the most common allele  
102 (rs1250259-A) and lower pulse pressure, reduced CAD risk, as well as to changes in blood FN1  
103 levels (**Table S2, Table S3**) [2,18–21]. While FN1 levels as a function of the rs1250259  
104 genotype are not available, the proximal CAD protective T allele (rs1250258-T), closely linked  
105 ( $R^2 = 0.99$ ) to rs1250259-A is associated with increased circulating FN1 and fragments thereof,  
106 suggesting that it may play a cardioprotective role [22].

107 We next performed Mendelian randomization to test a causal role for FN1 per se. In this  
108 analysis, all SNPs associated with changes in FN1 protein expression are pooled and tested for  
109 association of each of CAD risk and FN1 levels. Consistent with individual SNP contributions,  
110 FN1 and CAD were inversely correlated, with higher circulating FN1 linked to lower CAD  
111 prevalence (**Table 1**).

112

113 **Table 1.** Mendelian randomization reveals an of impact FN1 on CAD. Probes (protein  
114 concentration) and corresponding CAD values are from Suhre et al [22]. Bxy, regression  
115 coefficient of x and y; se, Standard Error; p, pvalue of the beta; nsnp: number of snps used in  
116 model; Z, Z-score of the correlation. All values are rounded to 2 significant figures.

117

| Probe     | Outcome | bxy    | se     | p        | nsnp | Z    |
|-----------|---------|--------|--------|----------|------|------|
| 3434-34_1 | CAD     | -0.059 | 0.0094 | 3.70E-10 | 5    | -6.3 |
| 4131-72_2 | CAD     | -0.061 | 0.0094 | 1.00E-10 | 4    | -6.5 |

118

119

120 **Identification of a missense mutation within FN1 linked to CAD that is predicted to affect**  
121 **secretion**

122 Although the above analysis focused on FN1 protein expression, the contribution to *FN1* mRNA  
123 expression remained to be tested. Genotype-Tissue Expression (GTEx) data indicate that the  
124 CAD linked haplotype region (using the top CAD SNP rs1250229 and rs1250259) was not  
125 associated with statistically significant changes in *FN1* expression in any of the available tissues  
126 (data not shown). This suggests that the haplotype may affect (harder to detect) distal genes,  
127 tissues not part of the GTEx panel or a combination thereof. Alternatively, the region may affect  
128 FN1 post-transcriptionally. Translation of rs1250259 is predicted to yield protein variants  
129 harboring either a Gln (rs1250259-T) or Leu (rs1250259-A) at position 15. Of note, the SNP  
130 haplotype is defined on the positive strand while the gene is transcribed in the negative  
131 orientation (**Fig S2**). FN1 is synthesized as a precursor that undergoes removal of a ~30 amino  
132 acid region containing a hydrophobic signal peptide (which includes residue 15) and a  
133 hydrophilic short pro-sequence [14].

#### 134 **The rs1250259 affects secretion of a FN1 fusion construct in transformed and primary cell** 135 **models**

136 To examine the impact of this substitution on FN1 secretion, a model fusion protein consisting of  
137 amino acids 1-182 of FN1 fused to a GFP-HA tag moiety was generated (**Figure 2A**).

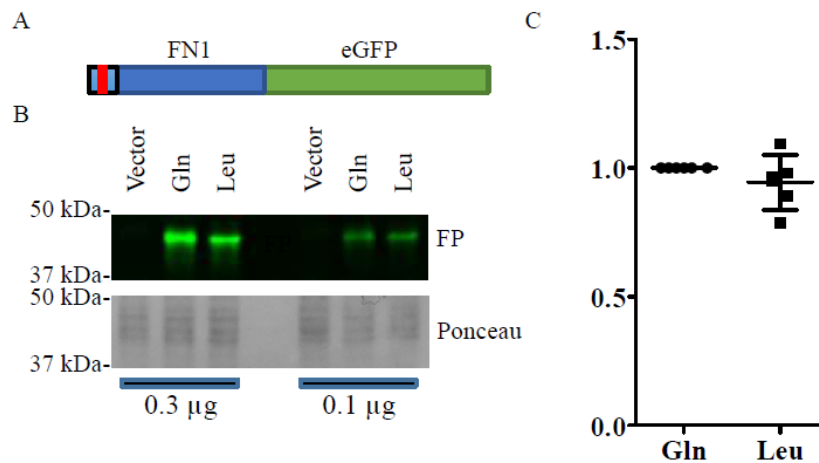

**Figure 2. Both FN1 variants express similarly in HEK293T cells.** A, Schema of the FN1-FP construct used. Drawing is approximately to scale. FN1 region corresponds to AA1-182, which encompasses, the signal peptide as well as 3 complete Fibronectin type-I domains corresponding to a previously reported crystal structure (2CG7, PDB entry). Signal peptide is in lighter blue. Red bar indicates position of the L15Q polymorphism. B, SDS-PAGE of HEK293T cell lysates expressing the common coding variants of FN1. HEK293T cells were transfected for 48 h with constructs encoding FN1-GFP fusion proteins. The Gln variant exhibited a slight retardation relative to the Leu variant. C, quantification of the cellular FP intensity after correction for transfection efficiency (Renilla).

138

139 This moiety is conserved in all FN1 forms and addresses technical limitations linked to the large  
140 size of FN1. The FN1 region chosen corresponds to the N-terminal heparin binding domain,  
141 which forms a well-defined region by crystallography and NMR and is shared by both secreted  
142 and cellular forms. Expression was first tested in HEK293T, a readily transfectable and widely  
143 available cell line. Following SDS-PAGE of cell lysates, a shift was observed: the Q15 form  
144 migrates slightly slower than the L15 variant (**Figure 2B**). Both fusion variants were present at  
145 comparable levels in HEK293T lysates after correcting for transfection efficiency (**Figure 2 C**).

146

Presence of the secreted protein in the media was tested next (**Figure 3**).



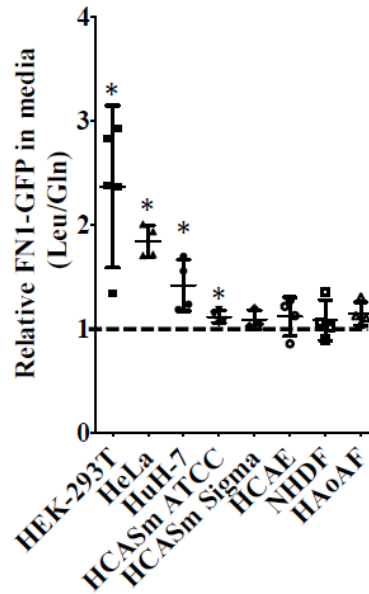

**Figure 3. Presence of the CAD protective allele results in increased secretion of a FN1 model construct.** Media and lysates from cells transfected for 48 hours with FN1-GFP plasmids encoding either Leu15 or Gln15 were analyzed by fluorometry. Ratios of media to cellular fluorescence were first assessed for each variant (L/Q) and the values for the Leu allele were divided by the corresponding Gln values. Results represent the mean from 3-5 biologicals  $\pm$  95% C.I. HCASm: human coronary artery smooth muscle cells from either ATCC or Sigma; HCAE: human coronary artery endothelial cells; NHDF: Normal Human Dermal fibroblast; HAoAF: Human aorta Adventitial fibroblast.

147

148 In HEK293T and HeLa cells, transfection resulted in the secretion of FN1-GFP in the media,  
149 with the L15 exhibiting greater propensity to be secreted, defined as the signal in the culture  
150 media relative to the cellular signal. To examine the impact of this polymorphism on secretion  
151 by the liver, which is the major physiological source of pFN1, HuH-7 hepatoma cells, a widely  
152 model of hepatocyte function, were transfected next. Although the difference was smaller than  
153 observed in the epithelial models above, L15 FN1-GFP was also more readily secreted by HuH-7  
154 cells. Finally, FN1-GFP was transfected into several primary cell models with relevance to  
155 CAD, i.e., adventitial fibroblasts, endothelial cells, and coronary smooth muscle cells. In all  
156 models, the Leu form seemed on average better secreted than the Gln form, although the  
157 difference reached statistical significance only in a lot of coronary smooth muscle cells.

158

159 **Secreted forms of Q15 qualitatively differ in some primary cells**

160 Examination of the variants by SDS-PAGE revealed some unexpected findings. Delivery of  
161 FN1-GFP demonstrated isoform-specific differences in the secreted forms, in a cell-type  
162 different manner (**Figure 4**).

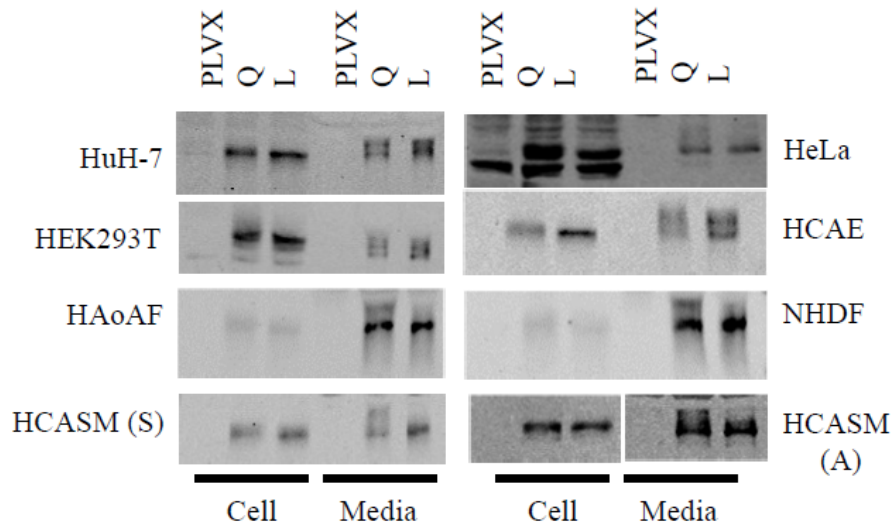

163 **Figure 4. Multiple FN1-GFP species are secreted in cell cultures.** Media (2% total well) and lysates (10% total well) from cells transduced for 72 hours with FN1-GFP plasmids encoding either L15 (T allele) or Q15 (A allele) were analyzed by Western blot. HCAE: human coronary artery endothelial cells; NHDF: Normal Human Dermal Fibroblast; HAoAF: Human aorta Adventitial fibroblast); HCASM: human coronary artery smooth muscle cells from either ATCC (A) or Sigma (S). Data is representative of at least 3 distinct biological replicates.

164 In some cells (fibroblasts, muscle models as well as HeLa cells), transduction of the Q15 form  
165 led to enrichment relative to the L15 form of a slower migrating band on SDS-PAGE. By  
166 contrast, FN1-GFP from endothelial cells and HEK293T resembled HuH-7 cells in that both  
167 secreted forms exhibited qualitatively more similar profiles. Thus, in some cell types, the L15Q  
168 polymorphism appears to dictate both quality and quantity of FN1-GFP secreted.

## 169 Differences in O-glycosylation account for the difference in migration

170 We hypothesized that this 3-5 kDa difference was due to variable levels of post-  
171 translational modifications, possibly glycosylation and/or retention of pro-peptides of different  
172 lengths. As full-length pFN1 is modified post-transcriptionally by O and N-linked glycosylation,  
173 events commonly associated with secretion, glycosylation was examined first. Both variants  
174 secreted from dermal fibroblasts were subjected to deglycosylation reactions *in vitro* using a  
175 cocktail of enzymes targeting a wide range of glycosylation chains. The incubation resulted in  
176 the disappearance of the slower migrating form (**Figure 5**).

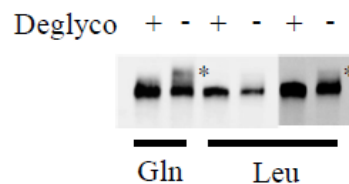

### 177 **Figure 5. Glycosylation patterns of Q15 and L15 FN1-GFP from dermal fibroblast differ.**

Media from NHDF transduced for 72 hours with FN1-GFP plasmids encoding either L15 (T allele) or Q15 (A allele) were recovered by immunoprecipitation with anti-HA beads, denatured and treated with (+) or without (-) deglycosylation enzymes prior to Western blotting using an anti-GFP antibody. A higher exposure of the Leu samples is included to facilitate L-Q comparison. \* indicates the position of a larger, glycosylated form.

178 Interestingly, a longer exposure of the L15 form also shows the presence of a slower migrating  
179 band that is also sensitive to glycosylation treatment. Thus, both forms are glycosylated, albeit  
180 to different extent.

181 The type of glycosylation involved was examined by treating cells with tunicamycin,  
182 which blocks N-glycosylation thereby interfering with protein transit through the Golgi

183 apparatus and secretion. Inclusion of tunicamycin severely reduced the amount, and altered the  
184 migration, of full-length FN1 recovered from the media but its impact on FN1-GFP was minor  
185 (**Figure S3**). These findings point to differential O-glycosylation between the two short FN1-  
186 GFP constructs.

### 187 **The L15Q polymorphism results in similar N-terminal sequences**

188 Although the slower form reflects distinct glycosylation, the underlying cause(s)  
189 remained to be clarified. We hypothesized that distinct glycosylation profiles might result from  
190 a shift in cleavage position of the signal peptide, as suggested by SignalP (**Figure S4**). Mass  
191 spectrometry of FN1-GFP fusions isolated from the culture media of NHDF however revealed  
192 that all forms consisted of either Gln or pyroGlu at their N-termini, consistent with previous  
193 studies on full-length pFN1 [23] (**Figure S5**). Thus, qualitative differences in N-terminal  
194 processing are unlikely to singly account for the different glycosylation patterns. Moreover,  
195 analysis of the gel region from the L15 sample, corresponding to a putative slower form,  
196 identified the unequivocal presence of FN1-GFP of lower abundance (~ 20% of the lower form),  
197 further suggesting that glycosylation occurs on both forms albeit to different extent, with the Q15  
198 form showing increased glycosylation.

### 199 **Quantitative differences in the secretion of the full-length FN1 variants**

200 The impact of the L15Q polymorphism on full-length FN1 was tested next. Due to its large size,  
201 expression of a recombinant FN1 is challenging since 1) primary cells are difficult to transfect  
202 and 2) its coding sequence is too large for lentiviral delivery. For these reasons, analyses were  
203 performed on HEK293T, which are readily transfectable and wherein the polymorphism had a  
204 sizeable impact on the secretion of the short FN1-GFP form. Moreover, analysis was focused on

205 the pFN1 given its established link as a pQTL to the L15Q variant. The pFN1 construct was  
206 modified to express a C-terminal HA tag to simplify analysis. Western blot analysis revealed an  
207 unexpected difference in expressing cells, as the introduction of Q15 variant resulted in 2 distinct  
208 bands in cell lysates, in contrast to the L15 which showed only one (**Figure 6A**).

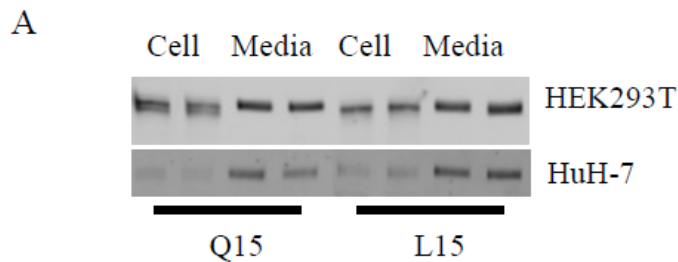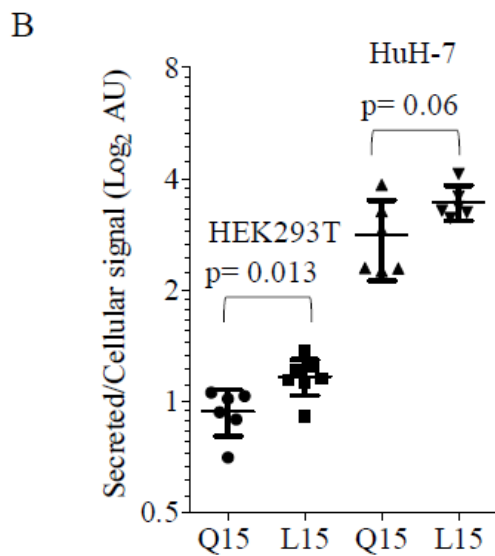

**Figure 6. The full-length FN1 Q15 variant is less efficiently processed and secreted.** Constructs encoding either variant of pFN1, tagged with a C-terminal Hemagglutinin tag, were transfected for 22 h in HEK293T or HuH-7 cells, as indicated A, Media and lysates were then analyzed by Western blot using an HA-specific antibody. Two biologies are shown for each construct. B, Quantification of FN1-HA Western blots. Signals from media and cytosol were quantified for each transfection and data is expressed as the secreted to cellular signals for Q15 and L15 ( $\pm$  95% C.I.). Each point represents a distinct biologic.

209  
210 By contrast the forms recovered from the media were similar. Interestingly, the additional Q15  
211 band migrated faster than the L15 band, suggesting a lower mass, that may represent an  
212 incompletely glycosylated protein. We reasoned that incomplete glycosylation might reflect a  
213 slower or impaired processing which would result in decreased secretion of mature FN1.  
214 Quantification of plasma and cellular signals indicated trends (not statistically significant) in

215 facilitated L15 secretion (increased media signal and reduced cell signal) (**Figure S6**). After  
216 internal correction to cellular signal however, a clear pattern emerged whereby the protective  
217 L15 variant showed statistically significant greater secretion (**Figure 6B**)

## 218 **Macrophage polarization is associated with increased cellular and secreted FN1**

219 The above experiments with the FN1-GFP fusion suggested that the cardioprotective  
220 form (L15) is secreted with greater efficiency and may be glycosylated to different extent. How  
221 increased FN1 might translate into reduced CAD risk or which form (cFN and/or pFN) may be  
222 most affected is unclear. Previous findings demonstrated that cFN expressing smooth muscle  
223 cells were associated with macrophage infiltration in plaque lesions [24]. In addition, deposited  
224 transcription data of human macrophages derived from *in vitro* differentiated blood monocytes,  
225 show increased FN1 expression in alternatively activated (anti-inflammatory M2) vs classically  
226 activated (inflammatory M1) or unpolarized macrophages [25] (**Figure S7**). That analysis  
227 however provided only total FN1 levels and did not examine secreted and cellular forms  
228 separately, which may be regulated differently. Using exon bridging strategies targeting either  
229 form in blood derived macrophages, we observed that pFN1 and cFN1 were similarly affected by  
230 polarization, although levels of pFN1 were more sensitive than cFN1 to the polarization status  
231 (M2/M1 pFN1 vs cFN1 = 1.3;  $p = 0.008$ ) (**Figure 7**).

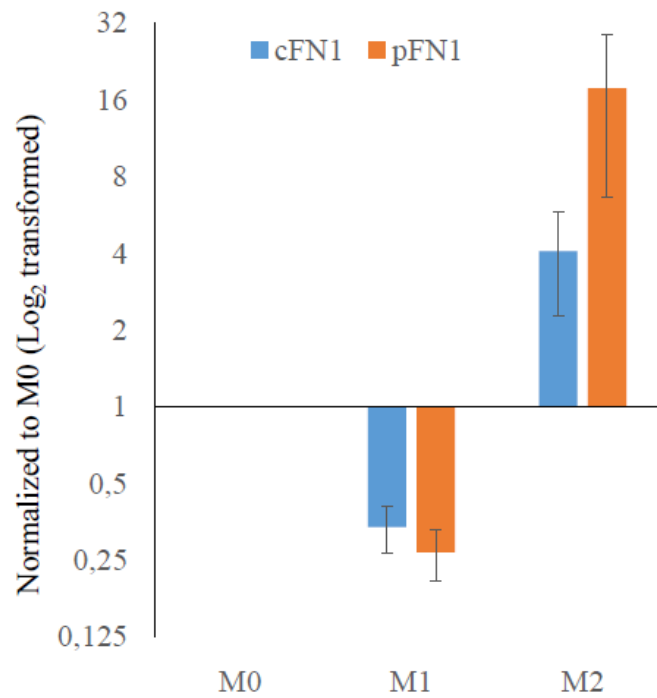

**Fig 7. FN1 isoforms are decreased in M1- and increased in M2-activated macrophages.** Levels of cFN1, pFN1 and SPR14 in human blood derived macrophages were measured by qRT-PCR. FN1 values were first normalized to the matching SPR14 values and are graphed relative to the M0 values (set to 1).

232

233

234

## 235 Discussion

236 Here, we provide experimental evidence that the CAD protective allele of a GWAS-identified  
237 SNP increases FN1 secretion. This work provides new insights into the more global issue  
238 surrounding the role of FN1 in the pathogenesis of CAD, which is explained by genetic and  
239 environmental factors in approximately equal proportion [26]. Moreover, it points to the role of  
240 a common variant that contributes to the heritable component of the disease. The pervasiveness  
241 of both alleles (Global Mean Allele Frequency: 0.23/0.77) in diverse ethnic groups, albeit with  
242 an uneven geographic distribution, suggests that the CAD risk variant encoding the Q15 form  
243 may confer some evolutionary benefit. Perhaps lower FN1 expression, at the expense of slightly  
244 greater risk of CAD, may enable a more potent immune response that may be advantageous to  
245 combat infections or protect from cancer. Examination of the UK biobank data via the PheWeb  
246 interface (<http://pheweb.sph.umich.edu/SAIGE-UKB/gene/FN1>) demonstrates an association of  
247 *FN1* with neoplasm ( $P=8.9e-7$ ). While demonstrating that *FN1* may be linked to cancer, the link  
248 is with rs139452116 which results in a rare P2016L substitution and no significant association is  
249 evident for rs1250259, a SNP in strong LD with the signal peptide SNP rs1250258.

250 Signal peptides are critical for the proper maturation and secretion of extracellular  
251 proteins. Thus, mutations within secretion signal peptides can have profound repercussions if  
252 they affect the ability of the secretory apparatus to process them. A very rare R14W mutation  
253 within the signal sequence of carbonic anhydrase IV (CA4) is linked to retinitis pigmentosa and  
254 attributed to the accumulation of the immature protein within the ER, triggering the unfolded  
255 protein response and apoptosis [27]. Unlike this extreme and rare example, the common L15Q  
256 substitution has modest quantitative and qualitative impacts on FN1. Impacts on glycosylation  
257 observed on both FN1<sub>1-182</sub> GFP and full-length fibronectin did not yield a coherent pattern: the



258 Q15 form, while consistently less well secreted, exhibited increased glycosylation in FN1<sub>1-182</sub>  
259 GFP, at least in some primary models, but showed reduced glycosylation of full-length FN1 in  
260 our transformed cell models. Perhaps this reflects a cell-specific role of glycosylation in the  
261 control of FN1 secretion or, alternatively, a subsidiary role in defining the impact of the Q15L  
262 polymorphism. Additional investigations will be needed to resolve this question.

263 We demonstrate that the cardioprotective allele is linked to increased FN1 secretion  
264 indicating that circulating FN1 protects against CAD. One limitation to this interpretation is that  
265 it is derived from an integrative analysis of distinct cohorts: a UKBiobank/- and  
266 CARDIoGRAMplusC4D meta-analysis focusing on the genetics of CAD and correlative  
267 GWAS/pQTL derived from a healthy cohort [18,22]. One advantage of this approach is that by  
268 examining the impact of the SNPs predisposing to CAD on pFN1 levels in a largely healthy  
269 population, one avoids confounders frequently associated with CAD (additional underlying  
270 conditions, medications, etc.). This comes with an important limitation, as the impact of pFN1  
271 levels on CAD is an extrapolation, albeit an informed one.

272 One mechanism underlying the role of FN1 in CAD involves the inflammatory  
273 compartment. As shown for alveolar macrophages, maturation from monocytes *in vitro* is linked  
274 to increased fibronectin production and secretion, which is in turn reduced upon inflammatory  
275 stimuli [28]. We observed that FN1 expression followed a >50-fold expression gradient, ranging  
276 from its lowest in M1 to intermediate in M0 and maximal in M2. Higher FN1 concentration may  
277 help maintain lesional macrophages in a more differentiated and anti-inflammatory state, thereby  
278 inhibiting local macrophage proliferation and associated atherosclerotic inflammation [29–31].  
279 Alternatively, or in addition, increased production of FN1 may directly contribute to the  
280 suppression of the M1-like phenotype. Changes in FN1 levels conferred by this common genetic

281 variant are unlikely sufficient to induce polarization since induction of macrophage markers  
282 involves concerted changes including upregulation of both FN1 and integrins [32,33]. Rather, by  
283 subtly modulating the amount of available FN1, the variant may contribute to the formation of  
284 distinct inflammatory signatures within each macrophage subgroup.

285         Atherosclerosis has a complex, heterogeneous etiology, involving extensive tissue  
286 remodelling characterized by smooth muscle cell proliferation which is exacerbated by  
287 hypertension as well as invasion by circulating immune cells [34–36]. It was hypothesized that  
288 FN accumulation in the aortic media may play a role in the remodelling of the aortic wall in  
289 response to increased shear stress [37]. This is consistent with the observation that *FN1* SNPs  
290 are also linked to blood pressure traits, suggesting that FN1 might contribute to CAD in part  
291 through the regulation of the vascular tone. Thus, the cardioprotective property of FN1 might  
292 ultimately stem from its ability to regulate vascular wall ECM assembly, by jointly affecting  
293 vascular elasticity and inflammation.

294

295

## 296 **Materials and Methods**

### 297 **Tissue culture**

298 HuH-7 were obtained from and grown in low glucose DMEM supplemented with 1 g/L glucose  
299 and penicillin (0.1 mg/ml) and streptomycin (0.1mg/ml). HEK-293T and HeLa were from the  
300 ATCC and grown in DMEM with 4.5 g/L glucose supplemented with penicillin (0.1 mg/ml) and  
301 streptomycin (0.1mg/ml). Coronary smooth muscle cells were obtained from Sigma and the  
302 ATCC and maintained in the recommended media. Human coronary adventitial fibroblasts.  
303 Normal human dermal fibroblast. human aorta adventitial fibroblasts were purchased from  
304 Lonza. All primary cells were maintained in their recommended media. For fluorescence  
305 measurements, cells were shifted to phenol-free media for 48-72 h.

### 306 **DNA constructs**

307 The short GFP-HA fusion proteins (L15 and Q15) were obtained by chemical synthesis of two  
308 dsDNA block variants (BioBasic) encoding amino acid 1-182 of FN1 and inserted via restriction  
309 cloning in pLVX-puro digested with EcoRI/BamHI. The full-length pFN1 construct was  
310 obtained from Addgene (Fibronectin-human-plasma in pMAX; Plasmid #120401 [38]). A Q15L  
311 substitution was achieved by Q5 mutagenesis (New England Biolab) on a N-terminal Hind  
312 III/AvrII fragment transferred in pCMV5 digested similarly. Following validation by Sanger  
313 sequencing, the fragment was returned to the pMAX construct. A Hemagglutinin A epitope tag  
314 was then inserted via high fidelity assembly (NEBuilder HiFi DNA Assembly; New England  
315 Biolab) by swapping a synthetic fragment containing a C-terminal HA containing sequence  
316 within the RsrII digested pMAX pFN1 construct. The final assembly and sequences of these  
317 constructs are included in Supplemental Materials.

## 318 **Transfection and transduction**

319 Cells were transfected with lipofectamine 3000 (ThermoFisher) using a ratio of 3:2:1  
320 (lipofectamine 3000 ( $\mu$ l): P3000 reagent ( $\mu$ l): DNA ( $\mu$ g)). For infection, viral particles were first  
321 generated in HEK-293FT cells using PVLX-puro (Clontech) alongside psPAX2 and pMD2.G  
322 obtained from Addgene. Virus containing supernatants were filtered through 400 nm filters and  
323 frozen at -80 C as is. Infections were performed in the presence of polybrene (2  $\mu$ g/ml).

## 324 **Immunoprecipitation and Western blotting**

325 Cells were lysed in IP buffer (50 mM Tris-HCl, pH 7.4, 0.15 M NaCl, 0.1% Nonidet P40  
326 (IGEPAL), 5 mM MgCl<sub>2</sub>) for 2 min at 4 °C. Lysates (1 mg protein equivalent) were then cleared  
327 by centrifugation (17,000 Xg) for 5 min and 20  $\mu$ l of prewashed Anti-HA magnetic beads  
328 (Pierce) were added. For isolation from the media, 20  $\mu$ l of beads were added to 3 ml of 400 nm  
329 filtered media harvested 72 h post-infection. Western blot was performed using 8 or 10% mini  
330 gels followed by wet transfer (1 h, 100 V) to Western grade nitrocellulose (Bio-Rad). Blots were  
331 incubated in Intercept blocking buffer (LI-COR) for 1 h and incubated for 16 h at 4 °C in the  
332 presence of cognate primary antibodies diluted 1:2000 in TBS/T (50 mM Tris-HCl, pH 7.4, 0.15  
333 M NaCl, 0.1% Tween-20). Secondary antibodies (donkey anti-mouse (680) or -rabbit (700); LI-  
334 COR) were diluted 1:20,000. Four 1 min washes in PBS were performed after each antibody  
335 incubation.

## 336 **RNA isolation and qRT-PCR**

337 RNA was isolated using the High Pure Isolation Kit (Roche). The Transcriptor First Strand  
338 cDNA Synthesis Kit (Roche) was used to generate cDNA using a 1:1 mixture of random  
339 hexamer and oligodT. PCR amplification and quantification were performed on a Roche

340 LightCycler 480 using the SYBR Green I Master reaction mix (Roche). For each experiment,  
341 relative amounts of target cDNAs were first expressed relative to SRP14. Results shown  
342 represent the means of 3 biological replicates. Oligonucleotides used are described in  
343 Supplemental Materials.

344

### 345 **Mendelian Randomization**

346 To investigate the possibility of an association between plasma protein level of FN1 and CAD,  
347 we did multi-SNP summary-based Mendelian randomization (MR) analysis which is also known  
348 as 2-sample Mendelian randomization [39]. For this purpose, we obtained summary association  
349 statistics (Beta and Standard error) for SNPs (pQTLs) that are independently ( $r^2 < 0.2$ ) associated  
350 ( $P < 5e^{-8}$ ) with FN1 protein level and used these as an instrument to investigate a causal effect.  
351 This means, for SNPs in our instrument (MR  $N_{\text{SNP}}$ ), we also obtained their summary association  
352 statistics (Beta and Standard error) with CAD and contrasted the effect sizes of the SNPs on FN1  
353 (exposure) with the effect sizes of the SNPs on the CAD (outcome), to estimate the causal effect  
354 of FN1 on CAD. In this context, a significant negative association indicates individuals  
355 genetically susceptible to have higher levels of FN1 are at lower risk of CAD. MR analysis was  
356 done using the GSMR (*Generalised Summary-data-based Mendelian Randomisation*) algorithm  
357 implemented in GCTA software (version 1.92)[39]. As compared to other methods for 2-sample  
358 MR analysis, GSMR automatically detects and removes SNPs that have pleiotropic effect on  
359 both exposure and outcome using the HEIDI test; in addition, GSMR accounts for the sampling  
360 variance in  $\beta$  (beta) estimates and the linkage disequilibrium (LD) among SNPs, as such it is  
361 statistically more powerful than other 2-sample MR approaches. GSMR also incorporates a  
362 variety of quality assurance and helpful functions, notably aligning both GWAS summary

363 datasets to the same reference allele at each SNP. Excluding SNPs that difference between their  
364 allele frequency in GWAS summary datasets and the LD reference sample is greater than 0.2, a  
365 clumping function to only keep non-correlated ( $r^2 < 0.2$ ) SNPs (with association P-value  $< 5e^{-8}$ ) in  
366 the instrument and a function to generate the scatter plot of SNP effects. Previously we used this  
367 approach to investigate the role of circulating miRNAs with regard to cardiometabolic  
368 phenotypes [40]. We obtained GWAS summary statistics for CAD from the most recent meta-  
369 analysis of CARDIoGRAMplusC4D and UK Biobank [18] and GWAS summary statistics for  
370 SNPs that influence FN1 protein level from Suhre et al [22].

### 371 **Immunoprecipitation and deglycosylation reactions**

372 Culture media from Q15 and L15 NHDF infected for 96 h with lentiviral constructs expressing  
373 FN1-GFP-HA were recovered, supplemented with 1 mM PMSF and centrifuged (1000 X g, 2  
374 min) to remove cellular debris, and further cleared at high speed for 5 min (13,000 X g).  
375 Recombinant FN1-GFP-HA was isolated from 10 ml of media (corresponding to a 10 cm culture  
376 dish) using 25  $\mu$ l anti-HA Pure Proteome magnetic beads (Pierce). Beads were washed 4 X 0.5  
377 ml of PBS/1 % Triton X-100 and resuspended in 250  $\mu$ l of the same buffer. Aliquots (10%) of  
378 the isolates were used per deglycosylation reaction. Deglycosylation was performed using the  
379 Protein Deglycosylation Mix II according to the supplier's protocol (New England Biolab).  
380 Briefly, the immunoisolated material was denatured for 10 min at 75 °C and subjected to a  
381 deglycosylation reaction for 30 min at 20 °C and 180 min at 37 C, using enzyme mix (2.5  $\mu$ l) or  
382 a mock reaction (no enzyme mix) in 25  $\mu$ l of bead suspension. Samples were then denatured in  
383 SDS-PAGE sample buffer and analyzed by Western blotting.

### 384 **Protein Analysis by LC-MS/MS**

385 For mass spectrometry, Q15 and L15 FN1-GFP samples were immunoprecipitated from the  
386 media of transduced NHDF as described above, resolved by SDS-PAGE and stained by colloidal  
387 Coomassie blue (Simply blue); NHDF were chosen for their greater proliferative ability over  
388 coronary models while exhibiting similar shifts on SDS-PAGE. Gel pieces were than excised  
389 and destained; a gel area matching a putative, lower abundance glycosylated L form was also  
390 included, for a total of 4 samples. Two distinct biologics per sample were analyzed. Proteomics  
391 analysis was performed at the Ottawa Hospital Research Institute Proteomics Core Facility  
392 (Ottawa, Canada). Proteins were digested in-gel using trypsin (Promega) according to the  
393 method of Shevchenko [41]. Peptide extracts were concentrated by Vacufuge (Eppendorf). LC-  
394 MS/MS was performed using a Dionex Ultimate 3000 RLSC nano HPLC (Thermo Scientific)  
395 and Orbitrap Fusion Lumos mass spectrometer (Thermo Scientific). MASCOT software version  
396 2.6.2 ([Matrix Science](#), UK) was used to infer peptide and protein identities from the mass  
397 spectra. The observed spectra were matched against custom sequences and against an in-house  
398 database of common contaminants. The results were exported to Scaffold (Proteome Software,  
399 USA) for further validation and viewing.

400 **Acknowledgements and Funding:** This work was funded by a Canadian Institutes for Health  
401 Research Foundation grant (FRN:154308; RM).

402

403

404

405

406 **References**

- 407 **1.** van der Harst P, Verweij N. Identification of 64 Novel Genetic Loci Provides an  
408 Expanded View on the Genetic Architecture of Coronary Artery Disease. *Circ Res.*  
409 Wolters Kluwer Health; 2018;122: 433–443.
- 410 **2.** Warren HR, Evangelou E, Cabrera CP, Gao H, Ren M, Mifsud B, et al. Genome-wide  
411 association analysis identifies novel blood pressure loci and offers biological insights into  
412 cardiovascular risk. *Nat Genet.* Nature Publishing Group; 2017;49: 403–415.
- 413 **3.** Nelson CP, Goel A, Butterworth AS, Kanoni S, Webb TR, Marouli E, et al. Association  
414 analyses based on false discovery rate implicate new loci for coronary artery disease. *Nat*  
415 *Genet.* 2017;
- 416 **4.** Nicolae DL, Gamazon E, Zhang W, Duan S, Dolan ME, Cox NJ. Trait-Associated SNPs  
417 Are More Likely to Be eQTLs: Annotation to Enhance Discovery from GWAS. Gibson G,  
418 editor. *PLoS Genet.* 2010;6: e1000888.
- 419 **5.** Nica AC, Montgomery SB, Dimas AS, Stranger BE, Beazley C, Barroso I, et al.  
420 Candidate causal regulatory effects by integration of expression QTLs with complex trait  
421 genetic associations. *PLoS Genet.* 2010;6.
- 422 **6.** Schaid DJ, Chen W, Larson NB. From genome-wide associations to candidate causal  
423 variants by statistical fine-mapping. *Nat Rev Genet.* 2018;19: 491–504.
- 424 **7.** Wu Y, Zheng Z, Visscher PM, Yang J. Quantifying the mapping precision of genome-  
425 wide association studies using whole-genome sequencing data. *Genome Biol.* 2017;18:  
426 86.



- 427 **8.** Liu X, Li YI, Pritchard JK. Trans Effects on Gene Expression Can Drive Omnigenic  
428 Inheritance. *Cell*. 2019;177: 1022-1034.e6.
- 429 **9.** Cannon ME, Mohlke KL. Deciphering the Emerging Complexities of Molecular  
430 Mechanisms at GWAS Loci. *Am J Hum Genet*. 2018;103: 637–653.
- 431 **10.** Gupta RM, Hadaya J, Trehan A, Zekavat SM, Roselli C, Klarin D, et al. A Genetic  
432 Variant Associated with Five Vascular Diseases Is a Distal Regulator of Endothelin-1  
433 Gene Expression. *Cell*. 2017;170: 522-533.e15.
- 434 **11.** Smemo S, Tena JJ, Kim K-H, Gamazon ER, Sakabe NJ, Gómez-Marín C, et al. Obesity-  
435 associated variants within FTO form long-range functional connections with IRX3.  
436 *Nature*. Nature Publishing Group; 2014;507: 371–375.
- 437 **12.** Wang Y, He B, Zhao Y, Reiter JL, Chen SX, Simpson E, et al. Comprehensive Cis-  
438 Regulation Analysis of Genetic Variants in Human Lymphoblastoid Cell Lines. *Front*  
439 *Genet*. Frontiers Media S.A.; 2019;10.
- 440 **13.** To WS, Midwood KS. Plasma and cellular fibronectin: Distinct and independent functions  
441 during tissue repair. *Fibrogenesis and Tissue Repair*. 2011.
- 442 **14.** Gutman A, Yamada KM, Kornbliht A. Human fibronectin is synthesized as a pre-  
443 propolypeptide. *FEBS Lett*. 1986;207: 145–8.
- 444 **15.** Sakai T, Johnson KJ, Murozono M, Sakai K, Magnuson MA, Wieloch T, et al. Plasma  
445 fibronectin supports neuronal survival and reduces brain injury following transient focal  
446 cerebral ischemia but is not essential for skin-wound healing and hemostasis. *Nat Med*.  
447 2001;7: 324–330.

- 448 **16.** Moretti FA, Chauhan AK, Iaconcig A, Porro F, Baralle FE, Muro AF. A major fraction of  
449 fibronectin present in the extracellular matrix of tissues is plasma-derived. *J Biol Chem.*  
450 2007;282: 28057–28062.
- 451 **17.** Kumra H, Sabatier L, Hassan A, Sakai T, Mosher DF, Brinckmann J, et al. Roles of  
452 fibronectin isoforms in neonatal vascular development and matrix integrity. *PLoS Biol.*  
453 *Public Library of Science*; 2018;16.
- 454 **18.** van der Harst P, Verweij N. Identification of 64 Novel Genetic Loci Provides an  
455 Expanded View on the Genetic Architecture of Coronary Artery Disease Novelty and  
456 Significance. *Circ Res.* 2018;122: 433–443.
- 457 **19.** Staley JR, Blackshaw J, Kamat MA, Ellis S, Surendran P, Sun BB, et al. PhenoScanner: A  
458 database of human genotype-phenotype associations. *Bioinformatics.* Oxford University  
459 Press; 2016;32: 3207–3209.
- 460 **20.** Kamat MA, Blackshaw JA, Young R, Surendran P, Burgess S, Danesh J, et al.  
461 PhenoScanner V2: an expanded tool for searching human genotype–phenotype  
462 associations. *Bioinformatics.* Oxford University Press (OUP); 2019;
- 463 **21.** Emilsson V, Ilkov M, Lamb JR, Finkel N, Gudmundsson EF, Pitts R, et al. Co-regulatory  
464 networks of human serum proteins link genetics to disease. *Science (80- ). American*  
465 *Association for the Advancement of Science*; 2018;361.
- 466 **22.** Suhre K, Arnold M, Bhagwat AM, Cotton RJ, Engelke R, Raffler J, et al. Connecting  
467 genetic risk to disease end points through the human blood plasma proteome. *Nat*  
468 *Commun.* 2017;8: 14357.

- 469 **23.** Garcia-Pardo A, Pearlstein E, Frangione B. Primary structure of human plasma  
470 fibronectin. *J Biol Chem.* 1985;260: 10320–10325.
- 471 **24.** Dietrich T, Perlitz C, Licha K, Stawowy P, Atrott K, Tachezy M, et al. ED-B fibronectin  
472 (ED-B) can be targeted using a novel single chain antibody conjugate and is associated  
473 with macrophage accumulation in atherosclerotic lesions. *Basic Res Cardiol.* 2007;102:  
474 298–307.
- 475 **25.** Martinez FO, Gordon S, Locati M, Mantovani A. Transcriptional Profiling of the Human  
476 Monocyte-to-Macrophage Differentiation and Polarization: New Molecules and Patterns  
477 of Gene Expression. *J Immunol. The American Association of Immunologists;* 2006;177:  
478 7303–7311.
- 479 **26.** McPherson R, Tybjaerg-Hansen A. Genetics of Coronary Artery Disease. *Circ Res.*  
480 2016;118: 564–578.
- 481 **27.** Rebello G, Ramesar R, Vorster A, Roberts L, Ehrenreich L, Oppon E, et al. Apoptosis-  
482 inducing signal sequence mutation in carbonic anhydrase IV identified in patients with the  
483 RP17 form of retinitis pigmentosa. *Proc Natl Acad Sci U S A. Proc Natl Acad Sci U S A;*  
484 2004;101: 6617–6622.
- 485 **28.** Yamauchi K, Martinet Y, Crystal RG. Modulation of fibronectin gene expression in  
486 human mononuclear phagocytes. *J Clin Invest.* 1987;80: 1720–1727.
- 487 **29.** Tang J, Lobatto ME, Hassing L, van der Staay S, van Rijs SM, Calcagno C, et al.  
488 Inhibiting macrophage proliferation suppresses atherosclerotic plaque inflammation. *Sci*  
489 *Adv.* 2015;1: e1400223–e1400223.

- 490 **30.** Robbins CS, Hilgendorf I, Weber GF, Theurl I, Iwamoto Y, Figueiredo J-L, et al. Local  
491 proliferation dominates lesional macrophage accumulation in atherosclerosis. *Nat Med.*  
492 2013;19: 1166–72.
- 493 **31.** Jenkins SJ, Ruckerl D, Cook PC, Jones LH, Finkelman FD, van Rooijen N, et al. Local  
494 macrophage proliferation, rather than recruitment from the blood, is a signature of TH2  
495 inflammation. *Science* (80- ). 2011;332: 1284–8.
- 496 **32.** Xie B, Laouar A, Huberman E. Fibronectin-mediated cell adhesion is required for  
497 induction of 92-kDa type IV collagenase/gelatinase (MMP-9) gene expression during  
498 macrophage differentiation: The signaling role of protein kinase C- $\beta$ . *J Biol Chem.*  
499 1998;273: 11576–11582.
- 500 **33.** Ferreira OC, Valinsky JE, Sheridan K, Wayner EA, Bianco C, Garcia-Pardo A. Phorbol  
501 ester-induced differentiation of U937 cells enhances attachment to fibronectin and  
502 distinctly modulates the  $\alpha$ 5 $\beta$ 1 and  $\alpha$ 4 $\beta$ 1 fibronectin receptors. *Exp Cell Res. Exp Cell Res;*  
503 1991;193: 20–26.
- 504 **34.** Laurent S, Boutouyrie P. The Structural Factor of Hypertension: Large and Small Artery  
505 Alterations. *Circulation Research*. Lippincott Williams and Wilkins; 2015. pp. 1007–1021.
- 506 **35.** Brown IAM, Diederich L, Good ME, DeLalio LJ, Murphy SA, Cortese-Krott MM, et al.  
507 Vascular smooth muscle remodeling in conductive and resistance arteries in hypertension.  
508 *Arterioscler Thromb Vasc Biol.* Lippincott Williams and Wilkins; 2018;38: 1969–1985.
- 509 **36.** Intengan HD, Schiffrin EL. Vascular remodeling in hypertension: roles of apoptosis,  
510 inflammation, and fibrosis. *Hypertension*. 2001. pp. 581–587.

- 511 **37.** Bézie Y, Lamazière JMD, Laurent S, Challande P, Cunha RS, Bonnet J, et al. Fibronectin  
512 expression and aortic wall elastic modulus in spontaneously hypertensive rats. *Arterioscler*  
513 *Thromb Vasc Biol.* Lippincott Williams and Wilkins; 1998;18: 1027–1034.
- 514 **38.** Rossnagl S, Altrock E, Sens C, Kraft S, Rau K, Milsom MD, et al. EDA-Fibronectin  
515 Originating from Osteoblasts Inhibits the Immune Response against Cancer. *PLoS Biol.*  
516 *Public Library of Science*; 2016;14.
- 517 **39.** Zhu Z, Zheng Z, Zhang F, Wu Y, Trzaskowski M, Maier R, et al. Causal associations  
518 between risk factors and common diseases inferred from GWAS summary data. *Nat*  
519 *Commun.* Nature Publishing Group; 2018;9: 224.
- 520 **40.** Nikpay M, Beehler K, Valsesia A, Hager J, Harper M-E, Dent R, et al. Genome-wide  
521 identification of circulating-miRNA expression quantitative trait loci reveals the role of  
522 several miRNAs in the regulation of cardiometabolic phenotypes. *Cardiovasc Res.*  
523 2019;115: 1629–1645.
- 524 **41.** Shevchenko A, Tomas H, Havliš J, Olsen J V., Mann M. In-gel digestion for mass  
525 spectrometric characterization of proteins and proteomes. *Nat Protoc.* *Nat Protoc*; 2007;1:  
526 2856–2860.
- 527
- 528

Table S1. LD structure of the CAD associated variants proximal and overlapping FN1. Haploreg visualization of the top CAD associated SNP (according to Van der Harst et al; green highlight) and its relationship to other variants ( $r^2 > 0.8$ ), overlapping GENCODE genes and dbSNP functional annotation. The missense variant (rs1250259) is highlighted in yellow

| Pos (Chr 2; hg38) | LD ( $r^2$ ) | Variant    | Ref | Alt | Ref frequency (EUR) | Gene                   | dbSNP funct annot. |
|-------------------|--------------|------------|-----|-----|---------------------|------------------------|--------------------|
| 215422370         | 0.83         | rs1250248  | A   | G   | 0.79                | FN1                    | intronic           |
| 215423073         | 0.83         | rs13423742 | C   | G   | 0.21                | FN1                    | intronic           |
| 215427608         | 0.83         | rs1837121  | G   | A   | 0.78                | FN1                    | intronic           |
| 215430234         | 0.84         | rs1250239  | C   | G   | 0.78                | FN1                    | intronic           |
| 215430291         | 0.84         | rs1250240  | A   | G   | 0.78                | FN1                    | intronic           |
| 215430589         | 0.84         | rs1250241  | T   | A   | 0.78                | FN1                    | intronic           |
| 215431534         | 0.84         | rs1250242  | G   | C   | 0.78                | FN1                    | intronic           |
| 215433073         | 0.86         | rs1250244  | G   | C   | 0.78                | FN1                    | intronic           |
| 215434906         | 0.85         | rs1250247  | C   | G   | 0.78                | FN1                    | intronic           |
| 215435462         | 0.93         | rs1250258  | C   | T   | 0.78                | FN1                    | intronic           |
| 215435759         | 0.94         | rs1250259  | T   | A   | 0.79                | FN1                    | missense           |
| 215438330         | 0.8          | rs3910516  | A   | G   | 0.76                | 1.3kb 3' of AC012462.1 |                    |
| 215439661         | 1            | rs1250229  | T   | C   | 0.79                | 2.7kb 3' of AC012462.1 |                    |
| 215441111         | 0.9          | rs1250231  | G   | A   | 0.78                | 4.1kb 3' of AC012462.1 |                    |
| 215441912         | 1            | rs1250232  | C   | T   | 0.79                | 4.9kb 3' of AC012462.1 |                    |

**Table S2.** Association between rs1250259 and metabolic traits and diseases as identified by PhenoScanner (<http://www.phenoscanter.medschl.cam.ac.uk/>). Note that the effect allele displayed by PhenoScanner for rs1250259 corresponds to the common allele for rs1250259 and the alternate allele for rs1250258. The phased haplotype for the most common alleles are shown in green. Note that the beta for Fibronectin is in unit decrease. Thus the less common/effect allele (a1) reduces fibronectin levels and is linked to increased CAD.

| snp       | rsid      | hg19_coordinates | hg38_coordinates | a1 (effect allele) | a2 | trait                                     | efo               | study      | pmid     | ancestry | year | beta     | se       | p        | direction | n      | n_cases | n_controls | n_studies | unit          | dataset                             |
|-----------|-----------|------------------|------------------|--------------------|----|-------------------------------------------|-------------------|------------|----------|----------|------|----------|----------|----------|-----------|--------|---------|------------|-----------|---------------|-------------------------------------|
| rs1250258 | rs1250258 | chr2:216300185   | chr2:215435462   | C                  | T  | Nonsyndromic striae distensae stretch n - |                   | Tung       | 23633020 | European | 2013 | NA       | NA       | 1.51E-06 | NA        | 33930  | -       | -          | -         | -             | GRASP                               |
| rs1250258 | rs1250258 | chr2:216300185   | chr2:215435462   | C                  | T  | Blood protein levels [Fibronectin Fragm   | EFO_0008140       | Suhre K    | 28240269 | European | 2017 | 0.3092   | 0.05061  | 1.00E-09 | +         | -      | -       | -          | -         | unit decrease | NHGRI-EBI_GWAS_Catalog              |
| rs1250258 | rs1250258 | chr2:216300185   | chr2:215435462   | C                  | T  | Blood protein levels [Fibronectin]        | EFO_0008140       | Suhre K    | 28240269 | European | 2017 | 0.6675   | 0.0489   | 2.00E-42 | +         | -      | -       | -          | -         | unit decrease | NHGRI-EBI_GWAS_Catalog              |
| rs1250258 | rs1250258 | chr2:216300185   | chr2:215435462   | C                  | T  | Blood protein levels [Fibronectin]        | EFO_0008140       | Suhre K    | 28240269 | European | 2017 | 0.7113   | 0.04798  | 1.00E-49 | +         | -      | -       | -          | -         | unit decrease | NHGRI-EBI_GWAS_Catalog              |
| rs1250258 | rs1250258 | chr2:216300185   | chr2:215435462   | C                  | T  | Deep ovarian and/or rectovaginal disease  | EFO_0001065       | Uimari O   | 28333195 | European | 2017 | NA       | NA       | 3.00E-08 | NA        | -      | -       | -          | -         | -             | NHGRI-EBI_GWAS_Catalog              |
| rs1250258 | rs1250258 | chr2:216300185   | chr2:215435462   | C                  | T  | Comparative height size at age 10         | -                 | Neale B    | UKBB     | European | 2017 | 0.008653 | 0.001884 | 4.40E-06 | +         | 332021 | 0       | 332021     | 1         | -             | Neale-B_UKBB_EUR_2017               |
| rs1250258 | rs1250258 | chr2:216300185   | chr2:215435462   | C                  | T  | Height                                    | EFO_0004339       | Neale B    | UKBB     | European | 2017 | 0.009749 | 0.001962 | 6.74E-07 | +         | 336474 | 0       | 336474     | 1         | IVNT          | Neale-B_UKBB_EUR_2017               |
| rs1250258 | rs1250258 | chr2:216300185   | chr2:215435462   | C                  | T  | Impedance of leg right                    | -                 | Neale B    | UKBB     | European | 2017 | 0.01191  | 0.002499 | 1.86E-06 | +         | 331301 | 0       | 331301     | 1         | IVNT          | Neale-B_UKBB_EUR_2017               |
| rs1250258 | rs1250258 | chr2:216300185   | chr2:215435462   | C                  | T  | Systolic blood pressure                   | EFO_0006335       | Neale B    | UKBB     | European | 2017 | 0.01882  | 0.002796 | 1.71E-11 | +         | 317754 | 0       | 317754     | 1         | IVNT          | Neale-B_UKBB_EUR_2017               |
| rs1250258 | rs1250258 | chr2:216300185   | chr2:215435462   | C                  | T  | Coronary artery disease                   | EFO_0000378;EFO_1 | van der Ha | 29212778 | Mixed    | 2018 | 0.047    | 0.007955 | 3.50E-09 | +         | 296525 | 34541   | 261984     | 1         | log OR        | van-der-Harst-P_CAD-UKBB_Mixed_2018 |
| rs1250258 | rs1250258 | chr2:216300185   | chr2:215435462   | C                  | T  | Coronary artery disease                   | EFO_0000378;EFO_1 | van der Ha | 29212778 | Mixed    | 2018 | 0.0419   | 0.0065   | 9.12E-11 | +         | 547261 | 122733  | 424528     | 2         | log OR        | van-der-Harst-P_CAD_Mixed_2018      |
| rs1250259 | rs1250259 | chr2:216300482   | chr2:215435759   | A                  | T  | Low density lipoprotein                   | EFO_0004611       | GLGC       | 24097068 | European | 2013 | 0.0298   | 0.006    | 1.46E-06 | +         | 89888  | 0       | 89888      | 60        | IVNT          | GLGC_LDL_EUR_2013                   |
| rs1250259 | rs1250259 | chr2:216300482   | chr2:215435759   | A                  | T  | Total cholesterol                         | EFO_0004574       | GLGC       | 24097068 | European | 2013 | 0.0257   | 0.0059   | 7.56E-06 | +         | 94595  | 0       | 94595      | 60        | IVNT          | GLGC_TC_EUR_2013                    |
| rs1250259 | rs1250259 | chr2:216300482   | chr2:215435759   | A                  | T  | Nonsyndromic striae distensae stretch n - |                   | Tung       | 23633020 | European | 2013 | NA       | NA       | 9.01E-07 | NA        | 33930  | -       | -          | -         | -             | GRASP                               |
| rs1250259 | rs1250259 | chr2:216300482   | chr2:215435759   | A                  | T  | Coronary artery disease                   | EFO_0000378       | van der Ha | 29212778 | Mixed    | 2018 | 0.048    | 0.007305 | 5.00E-11 | +         | -      | -       | -          | -         | unit decrease | NHGRI-EBI_GWAS_Catalog              |
| rs1250259 | rs1250259 | chr2:216300482   | chr2:215435759   | A                  | T  | Pulse pressure                            | EFO_0005763       | Warren HF  | 28135244 | European | 2017 | 0.314    | 0.03549  | 9.00E-19 | +         | -      | -       | -          | -         | unit decrease | NHGRI-EBI_GWAS_Catalog              |
| rs1250259 | rs1250259 | chr2:216300482   | chr2:215435759   | A                  | T  | Comparative height size at age 10         | -                 | Neale B    | UKBB     | European | 2017 | -0.00878 | 0.001884 | 3.16E-06 | -         | 332021 | 0       | 332021     | 1         | -             | Neale-B_UKBB_EUR_2017               |
| rs1250259 | rs1250259 | chr2:216300482   | chr2:215435759   | A                  | T  | Height                                    | EFO_0004339       | Neale B    | UKBB     | European | 2017 | -0.00984 | 0.001961 | 5.30E-07 | -         | 336474 | 0       | 336474     | 1         | IVNT          | Neale-B_UKBB_EUR_2017               |
| rs1250259 | rs1250259 | chr2:216300482   | chr2:215435759   | A                  | T  | Impedance of leg right                    | -                 | Neale B    | UKBB     | European | 2017 | -0.01167 | 0.002498 | 2.97E-06 | -         | 331301 | 0       | 331301     | 1         | IVNT          | Neale-B_UKBB_EUR_2017               |
| rs1250259 | rs1250259 | chr2:216300482   | chr2:215435759   | A                  | T  | Systolic blood pressure                   | EFO_0006335       | Neale B    | UKBB     | European | 2017 | -0.01885 | 0.002795 | 1.57E-11 | -         | 317754 | 0       | 317754     | 1         | IVNT          | Neale-B_UKBB_EUR_2017               |
| rs1250259 | rs1250259 | chr2:216300482   | chr2:215435759   | A                  | T  | Coronary artery disease                   | EFO_0000378;EFO_1 | van der Ha | 29212778 | Mixed    | 2018 | -0.04722 | 0.007952 | 2.90E-09 | -         | 296525 | 34541   | 261984     | 1         | log OR        | van-der-Harst-P_CAD-UKBB_Mixed_2018 |
| rs1250259 | rs1250259 | chr2:216300482   | chr2:215435759   | A                  | T  | Coronary artery disease                   | EFO_0000378;EFO_1 | van der Ha | 29212778 | Mixed    | 2018 | -0.0424  | 0.0065   | 6.16E-11 | -         | 547261 | 122733  | 424528     | 2         | log OR        | van-der-Harst-P_CAD_Mixed_2018      |

Table S3. Phenotypic studies associated with variations in FN1 expression. Open Targets Genetics was interrogated for studies associated with FN1. The tool identifies SNPs associated with the FN1 term that were linked to various phenotypical traits. All variants are in tight LD ( $R^2 > 0.8$ ). A subset of the genome-wide significant ( $< 5E-8$ ) associations are shown.

| Lead Variant | Study ID     | Trait                                                      | Lead Variance | Beta    | Odds Ratio | PMID          | Effect | Common allele |
|--------------|--------------|------------------------------------------------------------|---------------|---------|------------|---------------|--------|---------------|
| rs1250229    | GCST005196   | Coronary artery disease                                    | 3.00E-19      | -0.0644 |            | PMID:29212778 | C      | T             |
| rs1250229    | GCST005194   | Coronary artery disease                                    | 1.58E-13      |         | 0.957      | PMID:29212778 | C      | T             |
| rs1250229    | GCST004787   | Coronary artery disease (myocardial infarction, percutaneo | 3.00E-13      |         | 0.934      | PMID:28714975 | C      | T             |
| rs1250229    | GCST004233_2 | LDL cholesterol levels [Trans-ethnic initial]              | 2.00E-09      | 0.0243  |            | PMID:28334899 | C      | T             |
| rs1250229    | GCST003302   | Cholesterol, total                                         | 1.00E-08      | 0.023   |            | PMID:26780889 | C      | T             |
| rs1250229    | GCST002222   | LDL cholesterol                                            | 3.13E-08      | 0.0243  |            | PMID:24097068 | C      | T             |
| rs1250231    | NEALE2_4080_ | Systolic blood pressure, automated reading                 | 8.70E-13      | -0.3427 |            |               | A      | G             |
| rs1250247    | GCST007096   | Pulse pressure                                             | 1.00E-21      |         |            | PMID:27841878 | G      | C             |
| rs1250247    | GCST007099   | Systolic blood pressure                                    | 1.00E-12      |         |            | PMID:27841878 | G      | C             |
| rs1250247    | GCST007097   | Pulse pressure                                             | 7.00E-11      |         |            | PMID:27841878 | G      | C             |
| rs1250247    | GCST007097_3 | Pulse pressure [EA]                                        | 3.00E-09      |         |            | PMID:27841878 | G      | C             |
| rs1250247    | NEALE2_30090 | Platelet crit                                              | 2.06E-08      | -0.0007 |            |               | G      | C             |
| rs1250248    | GCST007081   | Lung function (FVC)                                        | 1.00E-08      |         |            | PMID:30595370 | G      | C             |
| rs1250248    | GCST004235_2 | Total cholesterol levels [Trans-ethnic initial]            | 5.00E-08      | 0.0204  |            | PMID:28334899 | G      | C             |
| rs1250258    | GCST004365_2 | Blood protein levels [Fibronectin]                         | 1.00E-49      | 0.7113  |            | PMID:28240269 | T      | C             |
| rs1250258    | GCST004365_2 | Blood protein levels [Fibronectin Fragment 3]              | 2.00E-42      | 0.6675  |            | PMID:28240269 | T      | C             |
| rs1250258    | GCST007067   | Waist-hip ratio                                            | 7.00E-12      |         |            | PMID:30595370 | T      | C             |
| rs1250258    | GCST004365_2 | Blood protein levels [Fibronectin Fragment 4]              | 1.00E-09      | 0.3092  |            | PMID:28240269 | T      | C             |
| rs1250258    | GCST004370   | Deep ovarian and/or rectovaginal disease with dense adhes  | 3.00E-08      |         |            | PMID:28333195 | T      | C             |
| rs1250259    | GCST006585_6 | Blood protein levels [FN1]                                 | 5E-89         |         |            | PMID:30072576 | A      | T             |
| rs1250259    | GCST006585_1 | Blood protein levels [NPNT]                                | 1.00E-59      |         |            | PMID:30072576 | A      | T             |
| rs1250259    | GCST007087   | Systolic blood pressure                                    | 2.00E-22      |         |            | PMID:30595370 | A      | T             |
| rs1250259    | GCST004278   | Pulse pressure                                             | 9.00E-19      |         |            | PMID:28135244 | A      | T             |
| rs1250259    | GCST007268   | Diastolic blood pressure                                   | 1.00E-16      |         |            | PMID:30578418 | A      | T             |
| rs1250259    | GCST007269   | Pulse pressure                                             | 3.00E-16      |         |            | PMID:30578418 | A      | T             |
| rs1250259    | GCST006585_1 | Blood protein levels [SSR1]                                | 2.00E-13      |         |            | PMID:30072576 | A      | T             |
| rs1250259    | GCST006585_1 | Blood protein levels [NDUFS4]                              | 5.00E-13      |         |            | PMID:30072576 | A      | T             |
| rs1250259    | GCST006585_1 | Blood protein levels [P4HB]                                | 2.00E-11      |         |            | PMID:30072576 | A      | T             |
| rs1250259    | GCST007267   | Systolic blood pressure                                    | 1.00E-09      |         |            | PMID:30578418 | A      | T             |
| rs1250259    | GCST005195   | Coronary artery disease                                    | 2.90E-09      |         | 0.954      | PMID:29212778 | A      | T             |
| rs1250259    | GCST006585_1 | Blood protein levels [MUSK]                                | 5.00E-09      |         |            | PMID:30072576 | A      | T             |
| rs1250259    | GCST006585_1 | Blood protein levels [SET]                                 | 9.00E-09      |         |            | PMID:30072576 | A      | T             |



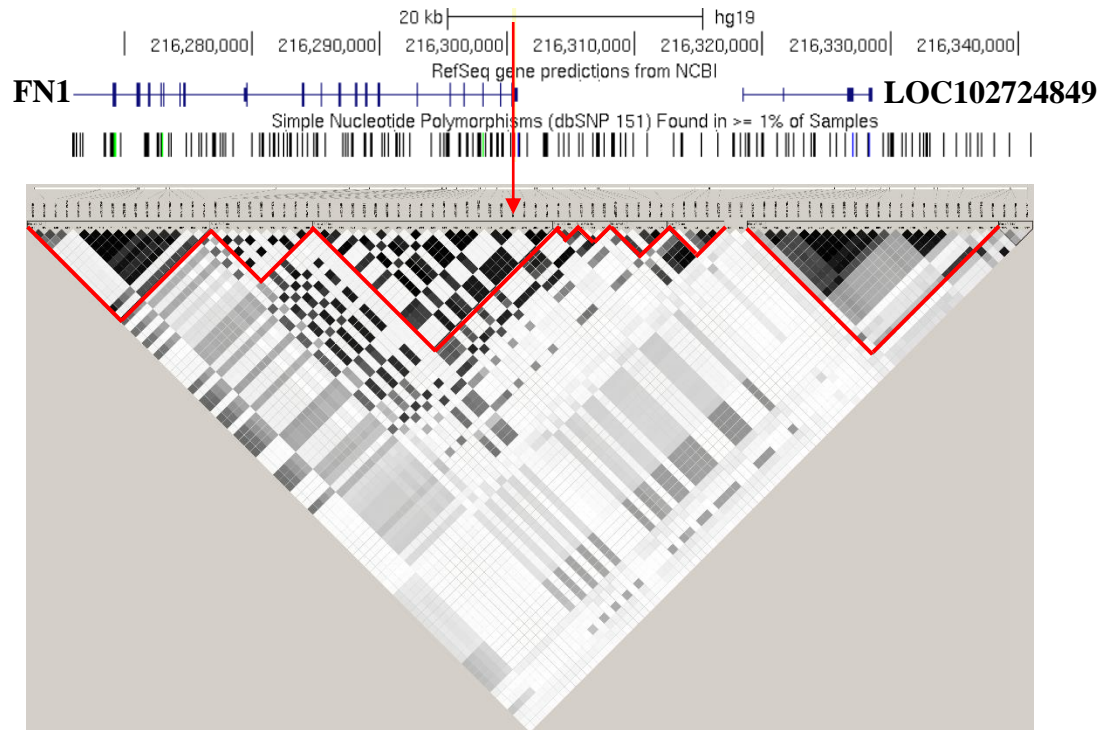

**Fig S1. Haploview map with overlapping genes.** Region spanning rs1975319 to rs6726337 is shown. LD intensity is proportional to linkage ( $R^2$ ) values. Blocks were defined using the LD spine method. LD Only common SNPs (frequency > 0.05) are shown. Red arrow points to rs1250259.

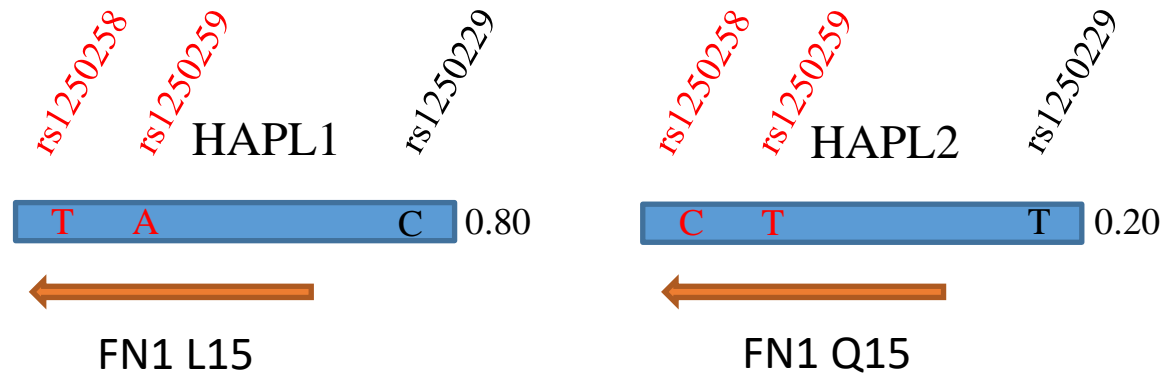

**Fig S2. Haplotype structure around rs1250229, linked to both CAD and blood pressure.** The T allele at rs1250229 (MAF 0.8 in EU), correlates with the presence of rs1250259-A ( $r^2=0.94$ ), resulting in T on the coding strand of FN1 which is expressed from the negative strand. The corresponding codon encodes a Leucine at position 15 of FN1 while the alternate allele codes for Glutamine. Numbers on the right are the fraction of the corresponding phased haplotype over the total number of observed haplotypes. Values are from the 1000 Genomes Project, using rs1250259 values (all populations). Genotype information for rs125058 and 59 were verified and found to be consistent with the Ottawa cohort genotyping.

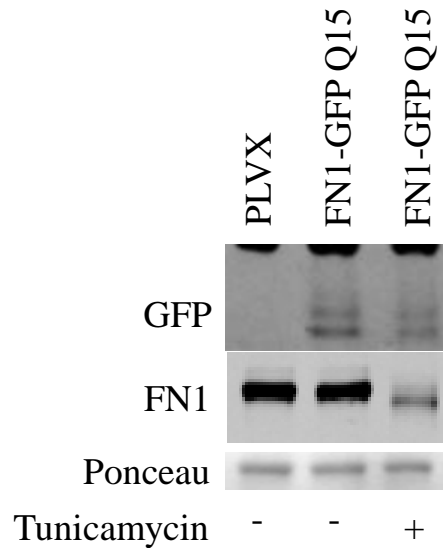

**Fig S3. Secreted FN1<sub>1-182</sub>-GFP is insensitive to Tunicamycin.** HuH-7 cells stably transduced with FN1 FN1<sub>1-182</sub>-GFP were treated for 24 h with 10  $\mu$ g/ml tunicamycin. Media were harvested and analyzed by Western blotting for FN1-GFP and full-length FN1, as a control for Tunicamycin efficacy. Ponceau stain of a ~ 150 kDa section matching the samples is included as a loading control.

**A**

|   | Signal peptide prediction | Cleavage site      | Probability of cleavage |
|---|---------------------------|--------------------|-------------------------|
| L | 0.99                      | TGA-SK (POS 26-27) | 0.27                    |
| Q | 0.97                      | GTA-VP (POS 20-21) | 0.26                    |

**B**

|   | Cleavage site      | Probability of cleavage |
|---|--------------------|-------------------------|
| L | STG-AS (POS 25-26) | 0.32                    |
| Q | STG-AS (POS 25-26) | 0.27                    |

**Fig S4. Bioinformatic predictions of L15Q variations on signal peptide cleavage.** The N-terminal domain of FN1 was analyzed via SignalP -5.0 (<http://www.cbs.dtu.dk/services/SignalP/>) (**A**) or TargetP-2.0 (<http://www.cbs.dtu.dk/services/TargetP/>) (**B**) to predict the impact of the Q15L natural variant on processing. Both approaches predict modestly reduced cleavage for the Q15 variant but only SignalP predicts a shift in the cleavage position.

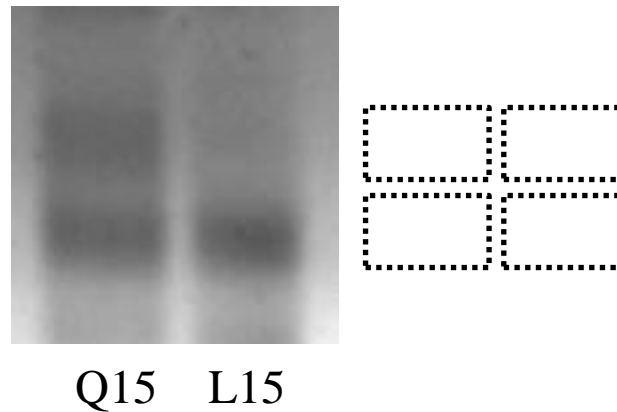

**Fig S5. Representative Coomassie stain of a SDS-PAGE gel of immunoprecipitated FN1-GFP-HA.** Q15 and L15 fusion proteins were isolated from 2.5 ml of media and analyzed by Western blot. Gel pieces derived from the slower (glycosylated) and faster forms were analyzed separately by LC-MS/MS. The boxes indicate the corresponding regions isolated from the gel (for clarity shown on the side of the gel).

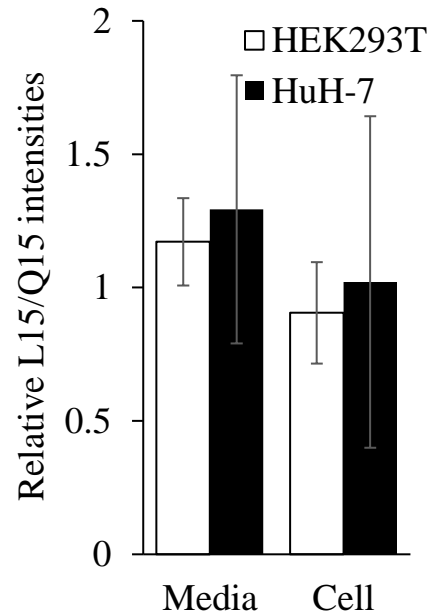

**Fig S6. Quantification of L15 and Q15 variants in the media and cell.** Data is expressed as the ratio of the L to Q Western blot signals in each compartment. Differences were not statistically significant.

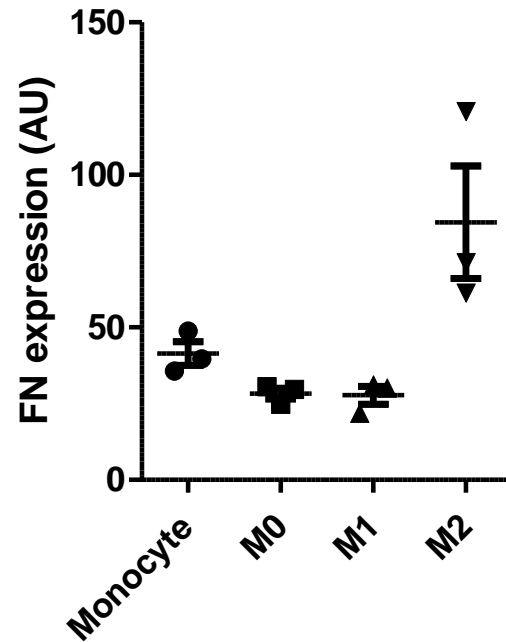

**Fig S7. FN1 expression as a function of polarization status.** Transcription array data from GDS2430 (PMID: 17082649) showing levels of FN1 (Probe ID: 214702\_at).

Ab:

GFP (Rabbit; Invitrogen: A11122)

GFP (Rabbit; Sigma: G1544); this Ab showed less non-specific signal than A11122

FN1 (Rabbit; GeneTex : GTX112794)

HA (Mouse; Covance: MMS-101R)

Oligonucleotides :

*Mutagenic primers (Q15L)*

Forward: CTGGCCGTCctGTGCCTGGGG

Reverse: CAGCAGCAGCCCGGGCCC

*qPCR primers*

sFN1

Forward: CCATCATCCCAGCTGTTCT

Reverse: GTTCGTAGACACTGGAGACAC

pFN1

Forward: CTGCAGTAACCAACATTGATCG

Reverse: TGAGGCCTTGCAGCTCTG

SRP14

Forward: ACTTCCGGCTCTCACTGCTA

Reverse: TCAAAGCCCTCCACAGTACC



pLVXFN1\_1-182GFPHA

*Short FN1 GFP1 expression construct*

Q15L substitution highlighted in red

GFP moiety in green

HA tag in red

```
TGGAAGGGCTAATCACTCCCAAAGAAGACAAGATATCCTTGATCTGTGGATCTACCACACACAAGGCTACTTCCC
TGATTAGCAGAACTACACACCAGGGCCAGGGTTCAGATATCCACTGACCTTTGGATGGTGCTACAAGCTAGTACC
AGTTGAGCCAGATAAGGTAGAAGAGGCCAATAAAGGAGAGAACACCAGCTTGTTACACCCTGTGAGCCTGCATG
GGATGGATGACCCGGAGAGAGAAGTGTAGAGTGGAGTTTGACAGCCGCTAGCATTTCATCACGTGGCCCGA
GAGCTGCATCCGGAGTACTTCAAGAAGTCTGATATCGAGCTTGCTACAAGGGACTTTCCGCTGGGGACTTTCCAG
GGAGGCGTGGCCTGGGCGGGACTGGGGAGTGGCGAGCCCTCAGATCCTGCATATAAGCAGCTGCTTTTGCCTGT
ACTGGGTCTCTCTGGTTAGACCAGATCTGAGCCTGGGAGCTCTCTGGCTAACTAGGGAACCCACTGCTTAAGCCTC
AATAAAGCTTGCCTTGAGTGCTTCAAGTAGTGTGTGCCGTCTGTTGTGTGACTCTGGTAACTAGAGATCCCTCAG
ACCTTTTAGTCAGTGTGGAAAATCTCTAGCAGTGGCGCCCGAACAGGGACTTGAAAGCGAAAGGGAAACCAGA
GGAGCTCTCTCGACGCAGGACTCGGCTTGCTGAAGCGCGCACGGCAAGAGGCGAGGGGCGGCGACTGGTGAGT
ACGCCAAAAATTTGACTAGCGGAGGCTAGAAGGAGAGAGATGGGTGCGAGAGCGTCAGTATTAAGCGGGGGA
GAATTAGATCGCGATGGGAAAAAATTCGGTTAAGGCCAGGGGGAAAGAAAAAATATAAATTAACATATAGTA
TGGGCAAGCAGGGAGCTAGAACGATTCGAGTTAATCCTGGCCTGTTAGAAACATCAGAAGGCTGTAGACAAATA
CTGGGACAGCTACAACCATCCCTTCAGACAGGATCAGAAGAACTTAGATCATTATATAATACAGTAGCAACCCCTC
ATTGTGTGCATCAAAGGATAGAGATAAAAGACACCAAGGAAGCTTTAGACAAGATAGAGGAAGAGCAAAACAAA
AGTAAGACCACCGCACAGCAAGCGGCCGCGCTGATCTTCAGACCTGGAGGAGGAGATATGAGGGACAATTGG
AGAAGTGAATTATATAAATATAAAGTAGTAAAAATTGAACCATTAGGAGTAGCACCCACCAAGGCAAAGAGAAGA
GTGGTGCAGAGAGAAAAAGAGCAGTGGGAATAGGAGCTTTGTTCTTGGGTTCTTGGGAGCAGCAGGAAGCAC
TATGGGCGCAGCGTCAATGACGCTGACGGTACAGGCCAGACAATTATTGTCTGGTATAGTGCAGCAGCAGAACAA
TTTGCTGAGGGCTATTGAGGCGCAACAGCATCTGTTGCAACTCACAGTCTGGGCATCAAGCAGCTCCAGGCAAG
AATCCTGGCTGTGGAAAGATACCTAAAGGATCAACAGCTCCTGGGGATTGGGGTTGCTCTGGAAAATCATTG
CACCCTGCTGTGCCTTGAATGCTAGTTGGAGTAATAAATCTCTGGAACAGATTTGGAATCACACGACCTGGATG
GAGTGGGACAGAGAAATTAACAATTACACAAGCTTAATACACTCCTTAATTGAAGAATCGCAAACCAGCAAGAA
AAGAATGAACAAGAATTATTGGAATTAGATAAATGGGCAAGTTTGTGGAATTGGTTAACATAACAAATTGGCTG
TGGTATATAAAATTTTACATAATGATAGTAGGAGGCTTGGTAGGTTTAAAGAATAGTTTTGCTGTACTTTCTATAGT
GAATAGAGTTAGGCAGGGATATTACCATTATCGTTTCAGACCCACCTCCCAACCCCGAGGGGACCCGACAGGCC
CGAAGGAATAGAAGAAGAAGGTGGAGAGAGAGACAGAGACAGATCCATTGATTAGTGAACGGATCTCGACGG
TATCGCCTTTAAAGAAAAGGGGGGATTGGGGGTACAGTGCAGGGGAAAGAATAGTAGACATAATAGCAACA
GACATACAACTAAAGAATTACAAAAACAAATTACAAAAATTCAAAATTTTCGGGTTTATTACAGGGACAGCAGAG
ATCCAGTTTATCGATAAGCTTGGGAGTTCCGCGTTACATAACTTACGGTAAATGGCCCGCTGGCTGACCGCCCAA
CGACCCCGCCCATGACGTCAATAATGACGTATGTTCCCATAGTAACGCCAATAGGGACTTTCCATTGACGTCAAT
GGGTGGAGTATTACGGTAAACTGCCACTTGGCAGTACATCAAGTGTATCATATGCCAAGTACGCCCTTATTGA
CGTCAATGACGGTAAATGGCCCGCTGGCATTATGCCAGTACATGACCTTATGGGACTTTCTACTTGGCAGTAC
ATCTACGTATTAGTCATCGCTATTACCATGGTGTATGCGTTTTTGGCAGTACATCAATGGGCGTGGATAGCGTTTTG
ACTCACGGGGATTTCCAAGTCTCCACCCATTGACGTCAATGGGAGTTTGTGTTTGGCACAAAATCAACGGGACTT
TCCAAAATGTCGTAACAACTCCGCCCCATTGACGCAATGGGCGGTAGGCGTGTACGGTGGGAGGTCTATATAAG
CAGAGCTCGTTTAGTGAACCGTCAGATCGCCTGGAGACGCCATCCACGCTGTTTTGACCTCCATAGAAGACACCGA
```

CTCTACTAGAGGATCGCTAGCGCTACCGGACTCAGATCTCGAGCTCAAGCTTCGAATTCTCAACATGCTTAGGGGT  
CCGGGGCCCCGGGCTGCTGCTGCTGGCCGTCCAGTGCCTGGGGACAGCGGTGCCCTCCACGGGAGCCTCGAAGAG  
CAAGAGGCAGGCTCAGCAAATGGTTCAGCCCCAGTCCCCGGTGGCTGTCAGTCAAAGCAAGCCCGTTGTTATGA  
CAATGGAAAACACTATCAGATAAATCAACAGTGGGAGCGGACCTACCTAGGCAATGCGTTGGTTTGTACTTGTAT  
GGAGGAAGCCGAGGTTTTAACTGCGAGAGTAACTGAAGCTGAAGAGACTTGCTTTGACAAGTACACTGGGAA  
CACTTACCGAGTGGGTGACACTTATGAGCGTCTAAAGACTCCATGATCTGGGACTGTACCTGCATCGGGGCTGG  
GCGAGGGAGAATAAGCTGTACCATCGCAAACCGCTGCCATGAAGGGGGTCAGTCCTACAAGATTGGTGACACCT  
GGAGGAGACCACATGAGACTGGTGGTTACATGTTAGAGTGTGTGTGTCTTGGTAATGGAAAAGGAGAATGGACC  
TGCAAGCCATAATGGTGAGCAAGGGCGAGGAGCTGTTACCGGGGTGGTGCCCATCCTGGTTCGAGCTGGACGG  
CGACGTAACCGCCACAAGTTCAGCGTGTCCGGCGAGGGCGAGGGCGATGCCACCTACGGCAAGCTGACCCTGA  
AGTTCATCTGCACCACCGCAAGCTGCCCGTGCCCTGGCCACCCTCGTGACCACCCTGACCTACGGCGTGCAGTG  
CTTCAGCCGCTACCCCGACCACATGAAGCAGCAGACTTCTTCAAGTCCGCCATGCCCGAAGGCTACGTCCAGGAG  
CGCACCATCTTCAAGGACGACGGCAACTACAAGACCCGCGCCGAGGTGAAGTTCGAGGGGCGACACCCTGGTG  
AACCGCATCGAGCTGAAGGGCATCGACTTCAAGGAGGACGGCAACATCCTGGGGCACAAGCTGGAGTACAACATA  
CAACAGCCACAACGTCTATATCATGGCCGACAAGCAGAAGAACGGCATCAAGGTGAAGTCAAGATCCGCCACAA  
CATCGAGGACGGCAGCGTGCAGCTCGCCGACCACTACCAGCAGAACACCCCATCGGCGACGGCCCCGTGCTGCT  
GCCCCACAACCACTACCTGAGCACCCAGTCCAAGCTGAGCAAAGACCCCAACGAGAAGCGCGATCACATGGTCTCT  
GCTGGAGTTCGTGACCGCCGCGGGATCACTCTCGGCATGGACGAGCTGTACAAGGGAGGTGCCGCGGATAACC  
CTTATGATGTGCCAGATTATGCCTGAGGATCCCAGCTCTAGATAATTCTACCGGGTAGGGGAGGGCGTTTTCCC  
AAGGCAGTCTGGAGCATGCGCTTTAGCAGCCCCGCTGGGCACTTGGCGCTACACAAGTGGCCTCTGGCCTCGCAC  
ACATTCCACATCCACCGGTAGGCGCCAACCGGCTCCGTTCTTTGGTGGCCCCCTCGCGCCACCTTCTACTCCTCCCCT  
AGTCAGGAAGTCCCCCGCCCCGAGCTCGCGTCGTGCAGGACGTGACAAATGGAAGTAGCACGTCTCACTAG  
TCTCGTGCAGATGGACAGCACCCTGAGCAATGGAAGCGGGTAGGCCTTTGGGGCAGCGGCAATAGCAGCTTT  
GCTCCTTCGCTTTCTGGGCTCAGAGGCTGGGAAGGGGTGGGTCCGGGGGCGGGCTCAGGGGCGGGCTCAGGGG  
CGGGGCGGGCGCCGAAGTCTCCGGAGGCCCGGATTCTGCACGCTTCAAAGCGCACGTCTGCCGCGTGT  
CTCCTTCTCCTCATCTCCGGGCTTTTCGACCTGCAGCCCAAGCTTACCATGACCGAGTACAAGCCCACGGTGCGCCT  
CGCCACCCGCGACGACGTCCCCAGGGCCGTACGCACCCTCGCCGCGGTTCCGCCACTACCCCGCCACGCGCCA  
CACCGTCGATCCGGACCGCCACATCGAGCGGGTCAACGAGCTGCAAGAACTTCTCCTCACGCGCGTCCGGGCTCGA  
CATCGGCAAGGTGTGGGTGCGGGACGACGGCGCCGCGGTGGCGGTCTGGACCACGCCGAGAGCGTGAAGCG  
GGGGCGGTGTTCCGCCGAGATCGGCCGCGCATGGCCGAGTTGAGCGGTTCCCGGCTGGCCGCGCAGCAACAGAT  
GGAAGGCCTCCTGGCGCCGACCGGCCAAGGAGCCCGGTGGTTCCTGGCCACCGTCGGCGTCTCGCCCGACCA  
CCAGGGCAAGGGTCTGGGACGCGCGTCTGCTCCCCGGAGTGGAGGCGCCGAGCGCGCCGGGGTCCCCGCC  
TTCCTGGAGACCTCCGCGCCCCGCAACCTCCCCTTCTACGAGCGGCTCGGCTTACCCTCACCGCCGACGTGAGG  
TGCCCGAAGGACCGCGCACCTGGTGCATGACCCGCAAGCCGGTGCCTGACCGCGTCTGGAACAATCAACCTCTG  
GATTACAAAATTTGTGAAAGATTGACTGGTATTCTTAACTATGTTGCTCCTTTTACGCTATGTGGATACGCTGCTTTA  
ATGCCTTTGTATCATGCTATTGCTTCCGATGGCTTTCATTTTCTCCTTGTATAAATCCTGGTTGCTGTCTCTTT  
ATGAGGAGTTGTGGCCGTTGTGAGGCAACGTGGCGTGGTGTGCACTGTGTTTGTGACGCAACCCCACTGGTT  
GGGGCATTGCCACCACCTGTGAGTCTTTCCGGGACTTTGCTTTCCCTCCCTATTGCCACGGCGGAACTCATC  
GCCGCTGCTTGGCCGCTGCTGGACAGGGGCTCGGCTGTTGGGCACTGACAATTCCGTGGTGTGTCGGGGAAG  
CTGACGTCCTTTCATGGCTGCTCGCCTGTGTTGCCACCTGGATTCTGCGCGGGACGTCTTCTGCTACGTCCCTTC  
GGCCCTCAATCCAGCGGACCTTCTTCCCGCGGCCTGCTGCCGGCTCTGCGGCCTTCCGCGTCTTGCCTTCGCC  
CTCAGACGAGTCGGATCTCCCTTTGGGCCGCTCCCCGCTGGAATTAATTCTGCAGTCGAGACCTAGAAAAACAT  
GGAGCAATACAAGTAGCAATACAGCAGCTACCAATGCTGATTGTGCCTGGCTAGAAGCACAAGAGGAGGAGGA  
GGTGGGTTTTCCAGTCACACCTCAGGTACCTTAAAGACCAATGACTTACAAGGCAGCTGTAGATCTTAGCCACTTTT

TAAAAGAAAAGAGGGGACTGGAAGGGCTAATTCCTCCCAACGAAGACAAGATATCCTTGATCTGTGGATCTACC  
ACACACAAGGCTACTTCCCTGATTAGCAGAACTACACACCAGGGCCAGGGGTGAGATATCCACTGACCTTTGGATG  
GTGCTACAAGCTAGTACCAGTTGAGCCAGATAAGGTAGAAGAGGCCAATAAAGGAGAGAACACCAGCTTGTTAC  
ACCCTGTGAGCTGCATGGGATGGATGACCCGGAGAGAGAAGTGTTAGAGTGGAGGTTTGACAGCCGCTAGCA  
TTTCATCACGTGGCCCCGAGAGCTGCATCCGGAGTACTTCAAGAAGTCTGATATCGAGCTTGCTACAAGGGACTTT  
CCGCTGGGGACTTTCCAGGGAGGCGTGGCCTGGGCGGGACTGGGGAGTGGCGAGCCCTCAGATCTGCATATAA  
GCAGCTGCTTTTTGCCTGTACTGGGTCTCTCTGGTTAGACCAGATCTGAGCCTGGGAGCTCTCTGGCTAACTAGGG  
AACCCACTGCTTAAGCCTCAATAAAGCTTGCTTGAGTGCTTCAAGTAGTGTGTGCCCGTCTGTTGTGTGACTCTGG  
TAACTAGAGATCCCTCAGACCCTTTTAGTCAGTGTGGAAAATCTCTAGCAGTAGTAGTTCATGTCTATTATTCC  
AGTATTTATAACTTGCAAAGAAATGAATATCAGAGAGTGGAGGCTTGACATTGCTAGCGTTTTACCGTCGACCT  
CTAGCTAGAGCTTGGCGTAATCATGGTCATAGCTGTTTCTGTGTGAAATTGTTATCCGCTCACAATTCCACACAAC  
ATACGAGCCGGAAGCATAAAGTGTAAAGCCTGGGGTGCCTAATGAGTGAGCTAACTCACATTAATTGCGTTGCGC  
TCACTGCCCCGTTTTCCAGTCGGGAAACCTGTCGTGCCAGCTGCATTAATGAATCGGCCAACGCGCGGGGAGAGGC  
GGTTTTCGTATTGGGCGCTCTTCCGCTTCTCGCTCACTGACTCGCTGCGCTCGGTCGTTCCGGCTGCGGCGAGCGG  
TATCAGCTCACTCAAAGGCGGTAATACGGTTATCCACAGAATCAGGGGATAACGCAGGAAAGAACATGTGAGCAA  
AAGGCCAGCAAAGGCCAGGAACCGTAAAAAGGCCGCTTGTGGCGTTTTTCCATAGGCTCCGCCCCCTGACG  
AGCATCACAAAATCGACGCTCAAGTCAGAGGTGGCGAAACCCGACAGGACTATAAAGATACCAGGCGTTTCCCC  
CTGGAAGCTCCCTCGTGCGCTCTCCTGTTCCGACCCTGCCGTTACCGGATACCTGTCCGCTTTCTCCCTTCGGGA  
AGCGTGGCGTTTTCTCATAGCTCACGCTGTAGGTATCTCAGTTCGGTGTAGGTCGTTCCGCTCCAAGCTGGGCTGTG  
TGCACGAACCCCCGTTCCAGCCGACCGCTGCGCTTATCCGGTAACTATCGTCTTGAGTCCAACCCGGTAAGACA  
CGACTTATCGCCACTGGCAGCAGCCACTGGTAACAGGATTAGCAGAGCGAGGTATGTAGGCGGTGCTACAGAGTT  
CTTGAAGTGGTGGCCTAACTACGGCTACACTAGAAGAACAGTATTTGGTATCTGCGCTCTGCTGAAGCCAGTTACC  
TTCGGAAAAAGAGTTGGTAGCTCTTGATCCGGCAAACAAACCACCGCTGGTAGCGGTGGTTTTTTTTGTTTGAAGC  
AGCAGATTACGCGCAGAAAAAAGGATCTCAAGAAGATCCTTTGATCTTTTCTACGGGGTCTGACGCTCAGTGGA  
ACGAAAACCTACGTTAAGGGATTTTGGTCATGAGATTATCAAAAAGGATCTTACCTAGATCCTTTTAAATTAATAA  
TGAAGTTTTAAATCAATCTAAAGTATATATGAGTAACTTGGTCTGACAGTTACCAATGCTTAATCAGTGAGGCAC  
CTATCTCAGCGATCTGTCTATTTGTTCCATCCATAGTTGCTGACTCCCCGTCGTGTAGATAACTACGATACGGGAG  
GGCTTACCATCTGGCCCCAGTGCTGCAATGATACCGCGAGACCCACGCTCACCGGCTCCAGATTTATCAGCAATAA  
ACCAGCCAGCCGGAAGGGCCGAGCGCAGAAGTGGTCTGCAACTTTATCCGCTCCATCCAGTCTATTAATTGTTG  
CCGGGAAGCTAGAGTAAGTAGTTCGCCAGTTAATAGTTTGCACAACGTTGTTGCCATTGCTACAGGCATCGTGGT  
GTCACGCTCGTCGTTTTGGTATGGCTTCACTCAGCTCCGTTCCCAACGATCAAGGCGAGTTACATGATCCCCATGT  
TGTGCAAAAAAGCGGTTAGCTCCTTCGGTCTCCGATCGTTGTCAGAAGTAAGTTGGCCGAGTGTATCACTCAT  
GGTTATGGCAGCACTGCATAATTCTTACTGTCATGCCATCCGTAAGATGCTTTTCTGTGACTGGTGAGTACTCAA  
CCAAGTCATTCTGAGAATAGTGTATGCGGGCACCAGTGTCTTTCGCCGCGTCAATACGGGATAATACCGCGC  
CACATAGCAGAACTTTAAAAGTGCTCATCATTGGAAAACGTTCTTCGGGGCGAAAACTCTCAAGGATCTTACCGCT  
GTTGAGATCCAGTTCGATGTAACCCACTCGTGCACCCAACTGATCTTACGATCTTTTACTTTACCAGCGTTTCTGG  
GTGAGCAAAAACAGGAAGGCAAAATGCCGCAAAAAGGGAATAAGGGCGACACGGAAATGTTGAATACTCATACT  
TCTTCTTTTTCAATATTATTGAAGCATTTATCAGGGTATTGTCTCATGAGCGGATACATATTTGAATGTATTTAGA  
AAAATAACAAATAGGGTTCCGCGCACATTTCCCCGAAAAGTGCCACCTGACGTCGACGGATCGGGAGATCAAC  
TTGTTTATTGCAGCTTATAATGGTTACAAATAAAGCAATAGCATCACAAATTTACAAATAAAGCATTTTTTTACTG  
CATTCTAGTTGTGGTTTGTCCAACTCATCAATGTATCTTATCATGTCTGGATCAACTGGATAACTCAAGCTAACCA  
AAATCATCCAAACTTCCACCCCATACCCTATTACCACTGCCAATTACCTGTGGTTTCACTTAACTTAACTGTGA  
TTCCTCTGAATTATTTTCAATTTAAAGAAATTGATTTGTTAAATATGTACTACAACTTAGTAGTTTTTAAAGAAAT  
GTATTTGTTAAATATGTACTACAACTTAGTAGT

pMAX pFN1HA

*Full-length pFN1 construct with C-terminal HA tag*

HA tag is red

N and C-terminal pFN1 amino acids are in green

Hind III site for screening purposes is highlighted

Q15L substitution is highlighted

TCAATATTGGCCATTAGCCATATTATTCATTGGTTATATAGCATAAATCAATATTGGCTATTGGCCATTGCATACGTT  
GTATCTATATCATAATATGTACATTTATATTGGCTCATGTCCAATATGACCGCCATGTTGGCATTGATTATTGACTAG  
TTATTAATAGTAATCAATTACGGGGTCATTAGTTCATAGCCCATATATGGAGTCCGCGTTACATAACTTACGGTAA  
ATGGCCCGCTGGCTGACCGCCCAACGACCCCGCCATTGACGTCAATAATGACGTATGTTCCCATAGTAACGCC  
AATAGGGACTTTCCATTGACGTCAATGGGTGGAGTATTTACGGTAAACTGCCACTTGGCAGTACATCAAGTGTAT  
CATATGCCAAGTCCGCCCCATTGACGTCAATGACGGTAAATGGCCCGCTGGCATTATGCCAGTACATGACCT  
TACGGGACTTTCTACTTGGCAGTACATCTACGTATTAGTCATCGCTATTACCATGGTGTGCGGTTTTGGCAGTAC  
ACCAATGGGCGTGGATAGCGGTTTGACTCACGGGGATTCCAAGTCTCCACCCATTGACGTCAATGGGAGTTTTGT  
TTTGGCACCAAAATCAACGGGACTTTCCAAAATGTCGTAATAACCCCGCCCCGTTGACGCAAATGGGCGGTAGGC  
GTGTACGGTGGGAGGTCTATATAAGCAGAGGTCGTTTAGTGAACCGTCAGATCACTAGTAGCTTTATTGCGGTAG  
TTTATCACAGTTAAATTGCTAACGCAGTCAGTGCTCGACTGATCACAGGTAAGTATCAAGGTTACAAGACAGGTTT  
AAGGAGGCCAATAGAACTGGGCTTGTGAGACAGAGAAGATTCTTGCGTTTCTGATAGGCACCTATTGGTCTTA  
CTGACATCCACTTTGCCTTCTCTCCACAGGGGTACCGCCATCATGAAGTTTAAACAAGCTTGAATTCTCTAGAGAT  
ATCCTGCAGAGATCTGGATCCCTCGAGGCTAGCTGTCAACATGCTTAGGGGTCCGGGGCCCGGGCTGCTGCTGCT  
GGCCGTCC(A/T)GTGCCTGGGACAGCGGTGCCCTCCACGGGAGCCTCGAAGAGCAAGAGGCAGGCTCAGCAAA  
TGGTTCAGCCCCAGTCCCCGGTGGCTGTGAGTCAAAGCAAGCCCGTTGTTATGACAATGGAAAACACTATCAGAT  
AAATCAACAGTGGGAGCGGACCTACCTAGGCAATGCGTTGGTTTGTACTTGTATGGAGGAAGCCGAGGTTTTAA  
CTGCGAGAGTAAACCTGAAGCTGAAGAGACTTGGCTTTGACAAGTACACTGGGAACACTTACCGAGTGGGTGACAC  
TTATGAGCGTCTAAAGACTCCATGATCTGGGACTGTACCTGCATCGGGGCTGGGCGAGGGAGAATAAGCTGTAC  
CATCGCAAACCGCTGCCATGAAGGGGGTCAAGTCTACAAGATTGGTGTGACACCTGGAGGAGACCACATGAGACTG  
GTGGTTACATGTTAGAGTGTGTGTCTTGGTAATGGAAAAGGAGAATGGACCTGCAAGCCCATAGCTGAGAAGT  
GTTTTGATCATGCTGCTGGGACTTCTATGTGGTCGGAGAAACGTGGGAGAAGCCCTACCAAGGCTGGATGATGG  
TAGATTGACTTGCCTGGGAGAAGGCAGCGGACGCATCACTTGCATTCTAGAAATAGATGCAACGATCAGGACA  
CAAGGACATCCTATAGAATTGGAGACACCTGGAGCAAGAAGGATAATCGAGGAAACCTGCTCCAGTGCATCTGCA  
CAGGCAACGGCCGAGGAGAGTGGAAAGTGTGAGAGGCACACCTCTGTGCAGACCACATCGAGCGGATCTGGCCCC  
TTCACCGATGTTCTGTCAGCTGTTTACCAACCGCAGCCTCACCCCGAGCCTCCTCCCTATGGCCACTGTGTACAGA  
CAGTGGTGTGGTCTACTCTGTGGGGATGCAGTGGCTGAAGACACAAGGAAATAAGCAAATGCTTTGCACGTGCCT  
GGGCAACGGAGTCAAGTCCCAAGAGACAGCTGTAACCCAGACTTACGGTGGCAACTCAAATGGAGAGCCATGTG  
TCTTACCATTACCTACAATGGCAGGACGTTTACTCTGACACAGAAAGGGCGACAGGACGGACATCTTTGGTGT  
CAGCACAACCTCGAATTATGAGCAGGACCAGAAATACTCTTTCTGCACAGACCACACTGTTTTGGTTCAGACTCGA  
GGAGGAAATTCCAATGGTGCCTTGTGCCACTTCCCCTTCTATACAACAACCACAATTACTGATTGCACTTCTGA  
GGGACAGAAAGAGACAACATGAAGTGGTGTGGGACCACACAGAACTATGATGCCGACCAGAAGTTTGGGTTCTGCC

CCATGGCTGCCACGAGGAAATCTGCACAACCAATGAAGGGGTCATGTACCGCATTGGAGATCAGTGGGATAAGC  
AGCATGACATGGGTACATGATGAGGTGCACGTGTGTTGGGAATGGTCGTGGGAATGGACATGCATTGCCTACT  
CGCAGCTTCGAGATCAGTGCATTGTTGATGACATCACTTACAATGTGAACGACACATTCCACAAGCGTCATGAAGA  
GGGGCACATGCTGAACTGTACATGCTTCGGTCAGGGTCGGGGCAGGTGGAAGTGTGATCCCGTCGACCAATGCC  
AGGATTCAGAGACTGGGACGTTTTATCAAATTGGAGATTCATGGGAGAAGTATGTGCATGGTGTGAGATACCACT  
GCTACTGCTATGGCCGTGGCATTGGGGAGTGGCATTGCCAACCTTTACAGACCTATCCAAGCTCAAGTGGTCTGT  
CGAAGTATTTATCACTGAGACTCCGAGTCAGCCAACTCCCACCCATCCAGTGAATGCACCACAGCCATCTCAC  
ATTTCCAAGTACATTCTCAGGTGGAGACCTAAAAATTCTGTAGGCCGTTGGAAGGAAGCTACCATACCAGGCCACT  
TAAACTCTACACCATCAAAGGCCTGAAGCCTGGTGTGGTATACGAGGGCCAGCTCATCAGCATCCAGCAGTACG  
GCCACCAAGAAGTGACTCGCTTGACTTACCACCACCAGCACCAGCACACCTGTGACCAGCAACACCGTGACAGG  
AGAGACGACTCCCTTTCTCTCTGTGGCCACTTCTGAATCTGTGACCGAAATCACAGCCAGTAGCTTTGTGGTCT  
CCTGGGTCTCAGCTTCCGACACCGTGTCCGGATTCCGGGTGGAATATGAGCTGAGTGAGGAGGGAGATGAGCCA  
CAGTACCTGGATCTTCCAAGCACAGCCACTTCTGTGAACATCCCTGACCTGCTTCTGGCCGAAAATACATTGTAAA  
TGTCTATCAGATATCTGAGGATGGGGAGCAGAGTTTGATCCTGTCTACTTCACAAACAACAGCGCCTGATGCCCA  
CCTGACCCGACTGTGGACCAAGTTGATGACACCTCAATTGTTGTCGCTGGAGCAGACCCAGGCTCCCATCACAG  
GGTACAGAATAGTCTATTCGCCATCAGTAGAAGGTAGCAGCACAGAACTCAACCTTCTGAAACTGCAAACCTCGT  
CACCTCAGTGACTTGCAACCTGGTGTTCAGTATAACATCACTATCTATGCTGTGGAAGAAAATCAAGAAAGTACA  
CCTGTTGTCAATCAACAAGAAACCACTGGCACCCACGCTCAGATACAGTGCCTCTCCCAGGGACCTGCAGTTTG  
TGGAAGTGACAGACGTGAAGGTCACCATCATGTGGACACCGCCTGAGAGTGCAGTGACCGGCTACCGTGTGGAT  
GTGATCCCGTCAACCTGCCTGGCGAGCACGGGCAGAGGCTGCCATCAGCAGGAACACCTTTGCAGAAGTACC  
GGGCTGTCCCTGGGGTACCTATTACTTCAAAGTCTTTGCAGTGAGCCATGGGAGGGAGAGCAAGCCTCTGACT  
GCTCAACAGACAACCAAACCTGGATGCTCCCACTAACCTCCAGTTTGTCAATGAAACTGATTCTACTGTCCTGGTGA  
GATGGACTCCACCTCGGGCCAGATAACAGGATACCGACTGACCGTGGGCCTTACCCGAAGAGGACAGCCCAGG  
CAGTACAATGTGGGTCCCTCTGTCTCCAAGTACCCACTGAGGAATCTGCAGCCTGCATCTGAGTACACCGTATCCCT  
CGTGGCCATAAAGGGCAACCAAGAGAGCCCCAAAGCCACTGGAGTCTTTACCACACTGCAGCCTGGGAGCTCTAT  
TCCACCTTACAACACCGAGGTGACTGAGACCACCTTGTGATCACATGGACGCCTGCTCCAAGAATTGTTTTAAG  
CTGGGTGTACGACCAAGCCAGGGAGGAGAGGCACCACGAGAAGTGACTTCAGACTCAGGAAGCATCGTTGTGTC  
CGGCTTGACTCCAGGAGTAGAATACGTCTACACCATCCAAGTCTGAGAGATGGACAGGAAAGAGATGCGCCAAT  
TGTAACAAAGTGGTGACACCATTGTCTCCACCAACAACTTGCATCTGGAGGCAAACCTGACACTGGAGTGCTC  
ACAGTCTCTGGGAGAGGAGCACCACCCAGACATTACTGGTTATAGAATTACCACAACCCCTACAAACGGCCAGC  
AGGGAAATCTTTGGAAGAAGTGGTCCATGCTGATCAGAGCTCCTGCACTTTTGATAACCTGAGTCCCGCCTGGA  
GTACAATGTCAGTGTTTACTGTCAAGGATGACAAGGAAAGTGTCCCTATCTCTGATACCATCATCCCAGCTGTC  
CTCTCCCACTGACCTGCGATTACCAACATTGGTCCAGACACCATGCGTGTCACTGGGCTCCACCCCATCCATT  
GATTTAACCAACTTCTGGTGCCTTACTCACCTGTGAAAAATGAGGAAGATGTTGCAGAGTTGTCAATTTCTCCTTC  
AGACAATGCAGTGGTCTTAACAAATCTCTGCCTGGTACAGAATATGTAGTGAGTGTCTCCAGTGTCTACGAACAA  
CATGAGAGCACACCTTTAGAGGAAGACAGAAAACAGGTCTTGATTCCCAACTGGCATTGACTTTTCTGATATTA  
CTGCCAACTCTTTACTGTGCACTGGATTGCTCCTCGAGCCACCATCACTGGCTACAGGATCCGCCATCATCCCGAG  
CACTTCAGTGGGAGACCTCGAGAAGATCGGGTGCCCCACTCTCGGAATTCATCACCTCACCAACCTCACTCCAG  
GCACAGAGTATGTGGTACGATCGTTGCTCTAATGGCAGAGAGGAAAGTCCCTTATTGATTGGCCAACAATCAAC  
AGTTTCTGATGTTCCGAGGGACCTGGAAGTTGTTGCTGCGACCCCCACCAGCCTACTGATCAGCTGGGATGCTCCT  
GCTGTCACAGTGAGATATTACAGGATCACTTACGGAGAAACAGGAGGAAATAGCCCTGTCCAGGAGTTCACTGTG  
CCTGGGAGCAAGTCTACAGCTACCATCAGCGCCTTAAACCTGGAGTTGATTATACCATCACTGTGTATGCTGTCA  
CTGGCCGTGGAGACAGCCCCGCAAGCAGCAAGCCAATTTCCATTAATTACCGAACAGAAATTGACAAACCATCCCA  
GATGCAAGTGACCGATGTTCCAGGGCAACAGCATTAGTGTCAAGTGGCTGCCTTCAAGTTCCCTGTTACTGTTAC

AGAGTAACCACCACTCCCAAAAATGGACCAGGACCAACAAAACTAAAAGTGCAGGTCCAGATCAAACAGAAATG  
ACTATTGAAGGCTTGCAGCCACAGTGGAGTATGTGGTTAGTGTCTATGCTCAGAATCCAAGCGGAGAGAGTCA  
CCTCTGGTTCCAGACTGCAGTAACCACTATTCTGCACCAACTGACCTGAAGTTCACTCAGGTCACACCCACAAGCCT  
GAGCGCCCAGTGGACACCACCAATGTTCACTGCTACTGGATATCGAGTGCAGGGTACCCCCAAGGAGAAGACCG  
GACCAATGAAAGAAATCAACCTTGCTCCTGACAGCTCATCCGTGGTTGTATCAGGACTTATGGTGCCACCAAATA  
TGAAGTGAGTGTCTATGCTCTTAAGGACACTTTGACAAGCAGACCAGCTCAGGGTGTGTCACCACTCTGGAGAAT  
GTCAGCCCACCAAGAAGGGCTCGTGTGACAGATGCTACTGAGACCACCATCACCATTAGCTGGAGAACCAAGACT  
GAGACGATCACTGGCTTCCAAGTTGATGCCGTTCCAGCCAATGGCCAGACTCCAATCCAGAGAACCATCAAGCCA  
GATGTCAGAAGCTACACCATCACAGTTTACAACCAGGCACTGACTACAAGATCTACCTGTACACCTTGAATGACA  
ATGCTCGGAGCTCCCTGTGGTCATCGACGCTCCACTGCCATTGATGCACCATCCAACCTGCGTTTCTGGCCACC  
ACACCCAATTCCTTGCTGGTATCATGGCAGCCGCCAGTGCCAGGATTACCGGCTACATCATCAAGTATGAGAAGC  
CTGGGTCTCCTCCAGAGAAGTGGTCCCTCGGCCCCGCCCTGGTGTACAGAGGCTACTATTACTGGCCTGGAACC  
GGGAACCGAATATACAATTTATGTCATTGCCCTGAAGAATAATCAGAAGAGCGAGCCCCCTGATTGGAAGGAAAA  
GACAGACGAGCTTCCCAACTGGTAACCCTTCCACACCCCAATCTTCATGGACCAGAGATCTTGGATGTTCTTCCA  
CAGTTCAAAGACCCCTTTCGTACCCACCCTGGGTATGACTGAAATGGTATTAGCTTCTGGCACTTCTGGT  
CAGCAACCCAGTGTGGGCAACAAATGATCTTTGAGGAACATGGTTTTAGGCGGACCACCCGCCACAACGGCC  
ACCCCCATAAGGCATAGGCCAAGACCATACCCGCCGAATGTAGGTGAGGAAATCCAAATTGGTCACATCCCAGG  
GAAGATGTAGACTATCACCTGTACCCACACGGTCCGGGACTCAATCCAAATGCCTCTACAGGACAAGAAGCTCTCT  
CTCAGACAACCATCTCATGGCCCCATTCCAGGACACTTCTGAGTACATCATTTTCATGTCATCTGTTGGCACTGAT  
GAAGAACCCTTACAGTTCAGGGTTCCTGGAACCTTACCAGTGCCACTCTGACAGGCCTCACCAGAGGTGCCACCT  
ACAACATCATAGTGGAGGCACTGAAAGACCAGCAGAGGCATAAGGTTCCGGAAGAGGTTGTTACCGTGGGCAAC  
TCTGTCAACGAAGGCTTGAACCAACCTACGGATGACTCGTGCTTTGACCCCTACACAGTTTCCATTATGCCGTTGG  
AGATGAGTGGGAACGAATGTCTGAATCAGGCTTTAACTGTTGTGCCAGTGCTTAGGCTTTGGAAGTGGTCATTT  
AGATGTGATTCTAGATGGTGCATGACAATGGTGTGAACTACAAGATTGGAGAGAAGTGGGACCGTCAGGG  
AGAAAATGGCCAGATGATGAGCTGCACATGTCTGGGAACGGAAAAGGAGAATTCAAGTGTGACCCTCATGAGG  
CAACGTGTTATGATGATGGGAAGACATAACCAGTAGGAGAACAGTGGCAGAAGGAATATCTCGGTGCCATTTGCT  
CCTGCACATGCTTTGGAGGCCAGCGGGCTGGCGCTGTGACAACTGCCGCAGACCTGGGGTGAACCCACTCCCG  
AAGGCACTACTGGCCAGTCTACAACAGTATTCTCAGAGATACCATCAGAGAACAACACTAATGTTAATTGCC  
AATTGAGTGCTTCATGCCTTTAGATGTACAGGCTGACAGAGAAGATTCCCGAGGGATACCTTATGATGTGCC  
**AGATTATGCC**TGAAGCTTGTGCCAGATTATGCCTGATTTAAACAGAGCTCGATGAGTTTGGACAAACCACAAC  
AATGCAGTGAAAAAATGCTTTATTTGTGAAATTTGTGATGCTATTGCTTTATTTGTAACCATTATAAGCTGCAATA  
AACAAGTTAACAACAACAATTGCATTCATTTTATAAGGCCTCACGTGACATGTGAGCAAAAGGCCAGCAAAAGGC  
CAGGAACCGTAAAAAGGCCGCTTGGCTGGCGTTTTTCCATAGGCTCCGCCCCCTGACGAGCATCACAATAATCGA  
CGCTCAAGTCAGAGGTGGCGAAACCCGACAGGACTATAAAGATACCAGGCGTTTCCCCCTGGAAGCTCCCTCGTGC  
GCTCTCCTGTTCCGACCCTGCCGCTTACGGGATACCTGTCCGCTTTCTCCCTTCGGGAAGCGTGGCGCTTTCTCATA  
GCTCACGCTGTAGGTATCTCAGTTCGGTGTAGGTGCTCGCTCCAAGCTGGGCTGTGTGCACGAACCCCCCGTTCA  
GCCCCACCGCTGCGCTTATCCGGTAACTATCGTCTTGAAGTCCAACCCGGTAAGACACGACTTATCGCCACTGGCAG  
CAGCCACTGGTAACAGGATTAGCAGAGCGAGGTATGTAGGCGGTGCTACAGAGTTCTTGAAGTGGTGGCCTAACT  
ACGGCTACACTAGAAGAACAGTATTTGGTATCTGCGCTCTGCTGAAGCCAGTTACCTTCGGAAGAGATTGGTA  
GCTCTTGATCCGGCAAAACAACACCGCTGGTAGCGGTGGTTTTTTTTGTTTGAAGCAGCAGATTACGCGCAGAAA  
AAAAGGATCTCAAGAAGATCCTTTGATCTTTTCTACGGGTCTGACGCTCAGTGAACGAAAACCTCACGTTAAGG  
GATTTTGGTATGCCGCTCAGAAGAACTCGTCAAGAAGGCGATAGAAGGCGATGCGCTGCGAATCGGGAGCGG  
CGATACCGTAAAGCACGAGGAAGCGGTACGCCATTGCGCCCAAGCTCTCAGCAATATCACGGGTAGCCAACG  
CTATGCTCTGATAGCGGTCCGCCACCCAGCCGCCACAGTGCATGAATCCAGAAAAGCGGCCATTTCCACCAT

GATATTCGGCAAGCAGGCATGCCATGGGTACGACGAGATCCTCGCCGTCGGGCATGCTCGCCTTGAGCCTGGC  
GAACAGTTCGGCTGGCGGAGCCCCTGATGCTCTTCGTCCAGATCATCCTGATCGACAAGACCGGCTTCCATCCGA  
GTACGTGCTCTCTCGATGCGATGTTTCGCTTGGTGGTGAATGGGCAGGTAGCCGGATCAAGCGTATGCAGCCGC  
CGCATTGCATCAGCCATGATGGATACTTTCTCGGCAGGAGCAAGGTGAGATGACAGGAGATCCTGCCCCGGCACT  
TCGCCAATAGCAGCCAGTCCCTTCCCGCTTCAGTGACAACGTCGAGTACAGCTGCGCAAGGAACGCCCGTCGTG  
GCCAGCCACGATAGCCGCGCTGCCTCGTCTTGACAGTTCATTGAGGGCACCGGACAGGTCGGTCTTGACAAAAGA  
ACCGGGCGCCCCTGCGCTGACAGCCGGAACACGGCGGCATCAGAGCAGCCGATTGTCTGTTGTGCCAGTCATAG  
CCGAATAGCCTCTCCACCCAAGCGGCCGAGAACCTGCGTGCAATCCATCTTGTTCAATCATAATATTATTGAAGC  
ATTATCAGGGTTCGTCTCGTCCCCTCCTCCCATGCATG
